1 **Title**

2  
3 A hidden Markov model approach for simultaneously estimating local ancestry and  
4 admixture time using next generation sequence data in samples of arbitrary ploidy  
5

6 **Short Title**

7  
8 Estimating local ancestry and admixture time in samples of arbitrary ploidy  
9

10 **Authors**

11  
12 Russell Corbett-Detig<sup>1,2,\*</sup> and Rasmus Nielsen<sup>2,3</sup>  
13

14 <sup>1</sup>Department of Biomolecular Engineering, UC Santa Cruz, Santa Cruz, CA

15 <sup>2</sup>Department of Integrative Biology, UC Berkeley, Berkeley, CA

16 <sup>3</sup>The Natural History Museum of Denmark, University of Copenhagen, Denmark.

17 \*Correspondence to: russcd@gmail.com  
18

19 **Keywords**

20  
21 Local Ancestry Inference, Admixture, Hidden Markov Model, *Drosophila melanogaster*,  
22 Pool-seq  
23  
24

25 **Abstract**

26 Admixture—the mixing of genomes from divergent populations—is increasingly  
27 appreciated as a central process in evolution. To characterize and quantify patterns of  
28 admixture across the genome, a number of methods have been developed for local ancestry  
29 inference. However, existing approaches have a number of shortcomings. First, all local  
30 ancestry inference methods require some prior assumption about the expected ancestry  
31 tract lengths. Second, existing methods generally require genotypes, which is not feasible to  
32 obtain for many next-generation sequencing projects. Third, many methods assume  
33 samples are diploid, however a wide variety of sequencing applications will fail to meet this  
34 assumption. To address these issues, we introduce a novel hidden Markov model for  
35 estimating local ancestry that models the read pileup data, rather than genotypes, is  
36 generalized to arbitrary ploidy, and can estimate the time since admixture during local  
37 ancestry inference. We demonstrate that our method can simultaneously estimate the time  
38 since admixture and local ancestry with good accuracy, and that it performs well on  
39 samples of high ploidy—*i.e.* 100 or more chromosomes. As this method is very general, we  
40 expect it will be useful for local ancestry inference in a wider variety of populations than  
41 what previously has been possible. We then applied our method to pooled sequencing data  
42 derived from populations of *Drosophila melanogaster* on an ancestry cline on the east coast  
43 of North America. We find that regions of local recombination rates are negatively  
44 correlated with the proportion of African ancestry, suggesting that selection against foreign  
45 ancestry is the least efficient in low recombination regions. Finally we show that clinal  
46 outlier loci are enriched for genes associated with gene regulatory functions, consistent  
47 with a role of regulatory evolution in ecological adaptation of admixed *D. melanogaster*

48 populations. Our results illustrate the potential of local ancestry inference for elucidating  
49 fundamental evolutionary processes.

50

## 51 **Author Summary**

52 When divergent populations hybridize, their offspring obtain portions of their genomes  
53 from each parent population. Although the average ancestry proportion in each descendant  
54 is equal to the proportion of ancestors from each of the ancestral populations, the  
55 contribution of each ancestry type is variable across the genome. Estimating local ancestry  
56 within admixed individuals is a fundamental goal for evolutionary genetics, and here we  
57 develop a method for doing this that circumvents many of the problems associated with  
58 existing methods. Briefly, our method can use short read data, rather than genotypes and  
59 can be applied to samples with any number of chromosomes. Furthermore, our method  
60 simultaneously estimates local ancestry and the number of generations since admixture—  
61 the time that the two ancestral populations first encountered each other. Finally, in  
62 applying our method to data from an admixture zone between ancestral populations of  
63 *Drosophila melanogaster*, we find many lines of evidence consistent with natural selection  
64 operating to against the introduction of foreign ancestry into populations of one  
65 predominant ancestry type. Because of the generality of this method, we expect that it will  
66 be useful for a wide variety of existing and ongoing research projects.

67

## 68 **Introduction**

69 Characterizing the biological consequences of admixture—the mixing of genomes from  
70 divergent ancestral populations—is a fundamental and important challenge in  
71 evolutionary genetics. Admixture has been reported in a variety of natural populations of  
72 animals [1,2], plants [3-5] and humans [6,7], and theoretical and empirical evidence  
73 suggests that admixture may affect a diverse suite of evolutionary processes. Individuals'  
74 ancestry can affect disease susceptibility in admixed populations, and inferring and  
75 correcting for sample population ancestries is a common practice in human genome wide  
76 association studies [8-10]. More generally, admixture has the potential to influence  
77 patterns of genetic variation within populations [11,12], to introduce novel adaptive  
78 [13,14] and deleterious variants [7,15,16], as well as to disrupt epistatic gene networks  
79 [17,18]. Therefore, developing a comprehensive understanding of the extent of admixture  
80 in natural populations and resulting mosaic genome structures is essential to furthering  
81 our understanding of a variety of evolutionary processes.

82  
83 Estimating genome-wide ancestry proportions has become a common practice in  
84 population genetic inference. For example, the program STRUCTURE [19], originally  
85 released in 2000, uses a Bayesian framework to model the ancestry proportions of  
86 individuals derived from any number of source populations based on genotype data at a set  
87 of unlinked genetic markers. More recently, this model for ancestry proportion estimation  
88 has been extended to cases where individual genotypes are not known, but can be studied  
89 probabilistically using low-coverage sequencing short read sequencing data [20], which is  
90 an important step towards accommodating modern sequencing practices. Additionally,

91 Bergland *et al.* [21] developed a method for estimating ancestry proportions in pooled  
92 population samples of relatively high ploidy (*i.e.* 40-250 distinct chromosomes) from short  
93 read sequencing data. In general, it is straightforward to estimate genome-wide ancestry  
94 proportions using a number of sequencing strategies and applications.  
95  
96 It is substantially more challenging to accurately estimate local ancestry (LA) at markers  
97 distributed along the genome of a sample. Nonetheless, analyses of LA have the potential to  
98 yield more nuanced insights into our understanding of the evolutionary processes affecting  
99 ancestry proportions across the genome. One of the first LA inference (LAI) methods was  
100 an extension of the STRUCTURE [19] framework that modeled the correlation in ancestry  
101 among markers due to linkage. Because the ancestry at each locus is not observed, Falush  
102 *et al.* [22] suggested that a hidden Markov model (HMM) is a straightforward means of  
103 inferring the ancestry states at each site in the genome (which are unobserved) based on  
104 observed genotype data distributed along a chromosome. Most subsequent LAI methods  
105 have also used an HMM framework, and the majority are geared towards estimating LA in  
106 admixed human populations (*e.g.* [23,24]). Consequently, most existing LAI methods are  
107 limited to diploid genomes with high quality genotype calls. Furthermore, many methods  
108 require phased reference panels [24,25], and require the user to provide an estimate of, or  
109 make implicit assumptions about, the number of generations since the initial admixture  
110 event [2,23-25]. This is straightforward with human population genomic samples, where  
111 abundant high quality genotyped samples are available and for which well-documented  
112 demographic histories are sometimes known. However for most other species,

113 demographic histories are less well characterized, and assumptions about admixture times  
114 may bias the result of LAI methods.

115  
116 A number of approaches exist to estimate the time since admixture based on well  
117 characterized ancestry tract length distributions [26-29] but in general, these parameters  
118 are unknown prior to LAI. Conversely, another class of methods can be used to estimate the  
119 time of admixture based on the decay of linkage disequilibrium without performing LAI  
120 [30-32]; however as with LAI procedure above, these approaches are also limited to diploid  
121 genotype data. We may therefore expect to improve LAI by simultaneously estimating LA  
122 and demographic parameters (*e.g.* admixture time). Furthermore, in the majority of  
123 sequencing applications, relatively low individual sequencing coverage is often used to  
124 probabilistically estimate individual and population allele frequencies (*e.g.* [33]) but these  
125 data are often not sufficient to determine high confidence genotypes that are required for  
126 existing LAI applications. Hence, there is a clear need for a general LAI method that can  
127 accommodate genotype uncertainty and requires less advanced knowledge of admixed  
128 populations' demographic histories.

129  
130 Here, we introduce a framework for simultaneously estimating LA using short read pileup  
131 data and the time of admixture within a population. Briefly, as with many previously  
132 proposed LAI methods, we model ancestry across the genome of a sample as a HMM. We  
133 estimate LA by explicitly modeling read counts as a function of sample allele frequencies  
134 within an admixed population. Our method is generalized to accommodate arbitrary  
135 sample ploidies, and is therefore applicable to haploid (or inbred), diploid, tetraploid, as

136 well as pooled sequencing applications. We show that this approach accurately infers the  
137 time since admixture when data are simulated under the assumed model. Furthermore, our  
138 method yields accurate LA estimates for simulated datasets, including samples of high  
139 sample ploidy and including evolutionary scenarios that violate the assumptions of the  
140 neutral demographic model. In comparisons between ours and an existing LAI method,  
141 WINPOP [34], we find that our approach offers a significant improvement and is accurate  
142 over longer time scales. Furthermore, we demonstrate, using a published dataset, that even  
143 state-of-the-art LAI methods can be significantly impacted by assumptions about the time  
144 since admixture, and that our method provides a solution to this problem.

145  
146 Finally, we apply this method to a *Drosophila melanogaster* ancestry cline on the east coast  
147 of North America. This species originated in sub-Saharan Africa, and approximately  
148 10,000—15,000 years ago a subpopulation expanded out of the ancestral range. During  
149 this expansion, the derived subpopulation experienced a population bottleneck that  
150 resulted in decreased nucleotide polymorphism, extended linkage disequilibrium within  
151 the derived population and substantial genetic differentiation between ancestral and  
152 derived populations [2,35-39]. Hereafter, the ancestral population will be referred to as  
153 “African” and the derived population as “Cosmopolitan”. Following this bottleneck,  
154 descendant populations of African and Cosmopolitan *D. melanogaster* have admixed in  
155 numerous geographic regions [2,11,21]. Of particular relevance to this work, North  
156 America was colonized recently by a population descendent from African individuals from  
157 the South, and by a population descendent from cosmopolitan *D. melanogaster* in the North  
158 [11,21,38]. Where these populations encountered each other in eastern North America,

159 they form an ancestry cline where southern populations have a greater contribution of  
160 African ancestry than northern populations [21].

161  
162 Previous work on these ancestry clines has shown that ancestry proportions vary across  
163 populations with increasing proportions of cosmopolitan alleles in more temperate  
164 localities. Evidence suggests spatially varying selection affects the distribution of genetic  
165 variants [40-45]. Furthermore, strong epistatic reproductive isolation barriers partially  
166 isolate individuals from northern and southern populations along this ancestry cline  
167 [46,47]. This may be generally consistent with recent observations of ancestry-associated  
168 epistatic fitness interactions within a *D. melanogaster* population in North Carolina [17],  
169 and with the observation of widespread fitness epistasis between populations of this  
170 species more generally [48]. There is therefore good reason to believe that natural  
171 selection has acted to shape LA clines that are tightly linked to selected mutations in these  
172 *D. melanogaster* populations.

173  
174 Here, we show that African ancestry in North American *D. melanogaster* populations is  
175 negatively correlated with recombination rates, consistent with more efficient selection  
176 against foreign ancestry in high recombination rate regions of the genome. We also find  
177 that the X chromosome displays a higher rate of LA outlier loci, potentially consistent with  
178 a greater role of the X chromosome in clinal adaptation. Clinal loci are disproportionately  
179 likely to be associated with high level gene regulatory protein complexes, and may play  
180 important roles in ecological divergence between African and Cosmopolitan *D.*  
181 *melanogaster* populations. Furthermore, we identify numerous loci with decreased African



182 ancestry across all populations, which suggests that these alleles that are disfavored on  
183 predominantly cosmopolitan genetic backgrounds. This subset of loci is enriched for genes  
184 related to oogenesis, potentially consistent with epistatic interactions that affect female  
185 reproductive success in these populations.

186

## 187 **Results and Discussion**

188

### 189 **The Model**

190 Although admixed populations often are diploid, we derived a general model of ploidy in  
191 which the individual has  $n$  gene copies at each locus, i.e. for diploid species  $n = 2$ . In  
192 practice, sequences are often obtained from fully or partially inbred individuals (e.g.  
193 [39,49]), which represent only a single uniquely derived chromosome. It is also common to  
194 pool individuals prior to sequencing for allele frequency estimation, so called pool-seq (e.g.  
195 [21,40,42,50-53]). If the pooling fractions are exactly equal, such a sample of  $b$  diploid  
196 individuals can be treated as a sample from a single individual with ploidy  $n = 2b$ . Although  
197 that requirement is restrictive, pool-seq has been experimentally validated as a method for  
198 accurate allele frequency estimation—*i.e.* alleles are approximately binomially sampled  
199 from the sample allele frequencies [54]. We therefore aimed to derive a model that can  
200 accommodate arbitrary sample ploidies. In the model, we assumed that the focal  
201 population was founded following a single discrete admixture event between two ancestral  
202 subpopulations, labeled 0 and 1, with admixture proportions  $1-m$  and  $m$ , respectively, at a  
203 time  $t$  generations in the past. We modeled emission probabilities such that the method  
204 can work directly on read pileup data, rather than high quality known genotypes. Briefly,

205 in our model, we specify an HMM  $\{H_v\}$  with state space  $S = \{0, 1, \dots, n\}$ , where  $H_v = i$ ,  $i \in S$ ,  
206 indicates that in the  $v$ th position  $i$  chromosomes are from population 0 and  $n - i$   
207 chromosomes are from population 1. In other words, this HMM enables one to estimate  
208 what ancestry frequencies are present at a given site along a chromosome within a sample.  
209 Importantly, we designed this method to simultaneously estimate the time of admixture,  
210 which is related to the correlation between ancestry informative markers along a  
211 chromosome. See Methods for a complete description of the HMM including the emissions  
212 and transition probability calculations. The source code and manual are available at  
213 [https://github.com/russcd/Ancestry\\_HMM](https://github.com/russcd/Ancestry_HMM). For this model, it is assumed that the number  
214 of chromosomes present in a sample,  $n$ , is known and that the global ancestry proportion,  
215  $m$ , is known. As there are many methods for accurately estimating  $m$  in a wide variety of  
216 contexts implemented in standard population genetic analysis pipelines [19,20], we believe  
217 this assumption is not too restrictive.

218

### 219 **Admixture Simulation Framework**

220 In order to test our method with data of known provenance, we also developed an  
221 approach for simulating chromosomes sampled from admixed populations. Briefly, we first  
222 simulated genetic diversity consistent with ancestral populations using a coalescent  
223 simulation method [55]. We then generated ancestry tracts consistent with admixture  
224 models developed to test our inference method using the forward-time admixture  
225 simulation program, SELAM [56]. We retained a portion of each coalescent-generated  
226 population to serve as a reference panel for allele frequency and LD estimation. We then  
227 took the remaining chromosomes and placed them on the appropriate ancestry tracts in

228 admixed chromosomes. Finally, we generated read counts for these chromosomes, or pools  
229 of chromosomes for samples with ploidy greater than one, via binomial sampling from the  
230 genotype frequencies of the sample. Implicitly, this procedure assumes that the allele  
231 frequencies in the reference panel and the admixed individuals whose ancestry is from a  
232 given reference panels are equivalent. For large, well-mixed populations such as those of *D.*  
233 *melanogaster*, this is likely to be a reasonable assumption. Nonetheless, below we assess  
234 the impact of differences in the ancestral allele frequencies for plausible demographic  
235 models in this species.

236

### 237 **Dependence on Ancestral Linkage Disequilibrium**

238 Within an admixed population, there are two sources of LD. LD that is induced due to the  
239 correlation of alleles from the same ancestry type (*i.e.* admixture LD), and LD that is  
240 present within each of the ancestral populations (ancestral LD). Admixture LD, is the signal  
241 of LA that we seek to detect using the HMM. The second type, ancestral LD, limits the  
242 independence of the ancestral information captured by each marker, and is expected to  
243 confound HMM-based analyses, particularly as we aimed to estimate the time since  
244 admixture within this framework. We therefore sought to quantify the effect of ancestral  
245 LD by discarding one of each pair of sites in LD within either ancestral population. We  
246 found that ancestral LD tends to increase admixture time estimates obtained using our  
247 method, and we decreased the cutoff of the LD parameter,  $|r|$ , by 0.1 until the time  
248 estimates obtained for single chromosomes were unbiased with respect to the true time  
249 since admixture. We found that  $|r| \leq 0.4$  fit this criterion, although for relatively ancient  
250 admixture events with highly skewed ancestry proportions—*i.e.*  $m < 0.1$  or  $m > 0.9$ —some

251 residual bias was apparent in the estimates of admixture time (Figure 1). This reflects the  
252 fact that the SMC' ancestry tract distribution performs poorly with highly skewed ancestry  
253 proportions and especially for long times since admixture [57].

254  
255 Figure 1 also reveals a striking difference between otherwise equivalently skewed  
256 admixture proportions. For example when  $m = 0.1$ , there was a much larger effect of  
257 ancestral LD than when  $m = 0.9$ . This is due to differences in the variability of LD within the  
258 ancestral populations. That is, due to the strong population bottleneck, cosmopolitan *D.*  
259 *melanogaster* populations have substantially more LD and fewer polymorphic sites than  
260 African *D. melanogaster* populations. Because the time estimation procedure appears to be  
261 sensitive to the amount of ancestral LD present in the data, simulations of the type we  
262 described here may be necessary to determine what  $|r|$  cutoffs are required to produce  
263 unbiased time estimates given the ancestral LD of the populations in a given analysis using  
264 this method.

265

## 266 **Accuracy and Applications to Diploid and Pooled Samples**

267 We next sought to quantify the accuracy of our approach across varying sample ploidies  
268 and times since admixture (Figure 2). Especially for moderate and short admixture times  
269 (*i.e.* 0—500 generations), our method performed well for all ploidies considered and we  
270 were able to accurately recover the correct admixture time with relatively little bias.  
271 However, as true admixture time increases, the time estimates for pooled samples become  
272 significantly less reliable and show a clear negative bias. Nonetheless, across the range of  
273 times presented in Figure 2, samples of ploidy one and two showed little bias, and we

274 therefore believe our method will produce sufficiently accurate admixture time estimates  
275 for a wide variety of applications.

276

277 All measures of accuracy decrease with increasing time since admixture (Figure 2).

278 However, even for relatively long times since admixture—2000 generations—and for large

279 sample ploidies, the mean posterior error remained relatively low for all ancestry

280 proportions and for long times since admixture. This indicates that this approach may be

281 sufficiently accurate for a wide variety of applications, sequencing depths, and sample

282 ploidies. Nonetheless, the proportion of sites within the 95% credible interval decreased

283 with larger pool sizes and it is clear that for larger pools the posterior credible interval

284 tends to be too narrow. Therefore, correcting for this bias may be necessary for

285 applications that are sensitive to the accuracy of the credible interval.

286

287 An important consideration is that estimates of  $t$  will be reliable only if the local

288 recombination rates are known with reasonably high accuracy [58]. In many species, an

289 accurate broad-scale map is available. However, fine-scale variation in recombination rates

290 has only been documented for a few model species. Therefore, for relatively short to

291 moderate times since admixture, error in the genetic map is expected to have a limited

292 impact on date estimates. However, for longer times since admixture, this factor has the

293 potential to bias estimates of  $t$  [58], particularly in species with large variance in local

294 recombination rates (*e.g.* due to hotspots). Since *D. melanogaster* has one of the best

295 recombination maps currently available in any species [59] and because we do not aim to

296 estimate time in our applications, we do not believe this will heavily impact the analyses

297 we present below. However, for most applications, it will be necessary to consider the  
298 impact of error in the assumed genetic map to accurately interpret estimates of  $t$  obtained  
299 using this method. We emphasize that this challenge is not unique to this application, but  
300 will impact virtually all ancestry estimation methods that rely on a genetic map for  
301 estimating the time since admixture.

302

### 303 **Non-Independence Among Ancestry Tracts**

304 As described above, estimates of the time of admixture demonstrate an apparent bias in  
305 pools of higher ploidy (Figure 2). Specifically, time tends to be slightly overestimated for  
306 relatively short admixture times and underestimated at relatively long admixture times.  
307 This is particularly apparent at highly skewed ancestry proportions. Given that this bias is  
308 primarily evident in pools of 10 to 20 individuals, we hypothesized that it might be due to  
309 the non-independence of ancestry tracts among chromosomes, which should tend to  
310 disproportionately affect samples of higher ploidy because all ancestry breakpoints are  
311 assumed to be independent in our model. To test this, we simulated genotype data from  
312 independent and identically distributed exponential tract lengths as is assumed by our  
313 model. When we ran our HMM on this dataset, we found that no bias is evident for  
314 simulations of up to 2000 generations (Supplemental Figure S1), indicating that the  
315 primary cause of this bias was violations in the real data of the independence of ancestry  
316 tracts that we assumed when computing the transition probabilities. However, it should be  
317 possible to quantify and correct for this bias in applications of this method that aim to  
318 estimate the time since admixture.

319

## 320 **Robustness to Unknown Population Size**

321 The transition probabilities of this HMM depend on knowledge of the population size. In  
322 practice, this parameter is unlikely to be known with certainty. Hence, to assess the impact  
323 of misspecification of the population size, we performed simulations using a range of  
324 population sizes that span three orders of magnitude ( $N=100$ , 1000, 10000, and 100000).  
325 All analyses presented here were conducted by applying our HMM to haploid and diploid  
326 samples, but qualitatively similar results hold for samples of larger ploidy. We then  
327 analyzed these data assuming the default population size, 10000, is correct. For relatively  
328 short times since admixture, there was not a clear bias for any of the true population sizes  
329 considered. However, at longer true admixture times, estimated admixture times for both  
330  $N=100$  and  $N=1000$  asymptote at a number of generations near to the population sizes.  
331 This result reflects the fact that smaller populations will tend to coalesce at a portion of the  
332 loci in the genome relatively quickly, and ancestry tracts cannot become smaller following  
333 coalescence. Nonetheless, the accuracy of LAI remained high even when time estimates  
334 were unreliable (Supplemental Figure S2) for the tested marker densities and patterns of  
335 LD. Furthermore, in some cases it should be straightforward to determine if a population  
336 has coalesced to either ancestry state at a large portion of the loci in the genome,  
337 potentially obviating this issue.

338  
339 A more subtle departure from the expectation was evident for population sizes that are  
340 larger than we assumed in analyzing these data (Supplemental Figure S2). This likely  
341 reflects the fact that the probability of back coalescence to the previous marginal genealogy  
342 to the left after a recombination event is inversely related to the population size. Hence, the

343 rate of transition between ancestry types is actually slightly higher in larger populations  
344 where back coalescence is less likely than we assumed during the LAI procedure. This  
345 produced a slight upward bias in the estimates of admixture time when the population was  
346 assumed to be smaller than it is in reality. However, this bias appears to be relatively  
347 minor, and we expect that time estimates obtained using this method will be useful so long  
348 as population sizes can be approximated to within an order of magnitude. Of course, this  
349 bias is not unique to our application, and it will affect methods that aim to estimate  
350 admixture time after LAI as well. That is, estimating the correct effective population size is  
351 an inherent problem for all admixture demographic inference methods.

352

### 353 **Application to Ancient Admixture**

354 Although it is clear that accurately estimating relatively ancient admixture times is  
355 challenging in higher ploidy samples, we sought to determine the limits of our approach for  
356 LAI and time estimation for longer admixture times for haploid sequence data. Because of  
357 rapid coalescence in smaller samples (see above), we performed admixture simulations  
358 with a diploid effective population size of 100,000. It is clear that there is a limit to the  
359 inferences that can be made directly using our method. Like the higher ploidy samples,  
360 time estimates for haploid samples departed from expectations shortly after 2,000  
361 generations since admixture (Supplemental Figure S3). Nonetheless, the magnitude of this  
362 bias is slight, and it is likely that it could be corrected for when applying this method even  
363 for very ancient admixture events. For all admixture times considered, LAI remained  
364 acceptably accurate despite the slight bias in time estimates (Supplemental Figure S3).

365



## 366 **Reference Panel Size**

367 One question is what effect varying the reference panel sizes will have on LAI inference  
368 using this method. We therefore compared results from reference panels of size 10  
369 chromosomes with those from panels of size 100 chromosomes (Supplemental Figure S4).  
370 As with results obtained for reference panels of size 50, panels of size 100 were sufficient  
371 to accurately estimate admixture time and LA over many generations since admixture.  
372 Whereas, when panel sizes were just 10 chromosomes, time estimates were clearly biased  
373 and the result was variable across ancestry proportions (Supplemental Figure S4).  
374 However, since there was a strong correlation between true and estimated admixture  
375 times even with relatively small panel sizes, it may therefore be possible to infer the  
376 correct time by quantifying this bias through simulation and correcting for it. Furthermore,  
377 although LAI is clearly less reliable with smaller panels, these results are not altogether  
378 discouraging and this approach, in conjunction with modest reference panels may still be  
379 effective for some applications.

380

## 381 **Allele Frequency Differences Between Ancestral and Admixed Populations**

382 Ultimately, there are three reasons why allele frequencies in the reference panels and in  
383 the admixed population panel would be expected to differ beyond that expected from  
384 binomial samples with the same mean. First, some amount of genetic drift may have  
385 occurred in the ancestral population and in the admixed population in the time since the  
386 admixed population was founded. Second, in some cases, it is infeasible to sample the  
387 ancestral population of an admixed group, and a genetically divergent population must  
388 suffice as the reference panel if this method is to be used. Third, divergent selection may

389 quickly modify allele frequencies between admixed and ancestral populations. Hence,  
390 genetic divergence between reference and admixed populations may be an important  
391 challenge for this method.

392  
393 To address this, we simulated the second scenario, where increasingly divergent  
394 populations are used as the reference panels to study admixed populations. In order to  
395 make this relevant to the application to *D. melanogaster* populations, below, we selected  
396 times for divergence that might be consistent with differences across continental  
397 populations in Sub-Saharan Africa and in Cosmopolitan populations. Although time  
398 estimates obtained using this approach are weakly positively biased with increasing  
399 divergence between the ancestral population and reference panels, the accuracy of this LAI  
400 method is largely unaffected (Supplemental Figure S5). Hence, for biological scenarios  
401 potentially consistent with those of *D. melanogaster* ancestral populations, we do not  
402 expect this challenge to strongly bias our method. Nonetheless, in applications to other  
403 populations, with potentially differently structured ancestral populations, it would be  
404 necessary to examine the effects of this bias in detail.

405

#### 406 **High Sample Ploidy**

407 In a wide variety of pool-seq applications, samples are pooled in larger groups than we  
408 have considered above (*e.g.* [40,50,52]). We are therefore interested in determining how  
409 our method will perform on pools of 100 individuals. Towards this, we performed  
410 simulations as before, but we designed our parameters to resemble those of the pooled  
411 sequencing data that we analyze in the application of this method below. Specifically, we

412 simulated data with a mean sequencing depth of 25, a time since admixture of 1500  
413 generations, and an ancestry proportion of 0.8. Consistent with results for ploidy 20, we  
414 found that time tends to be dramatically underestimated (*i.e.* the mean estimate of  
415 admixture time was 680 generations). However, when we provided the time since  
416 admixture, our method produced reasonably accurate LAIs for these samples. Although the  
417 posterior credible interval was again too narrow, the mean posterior error was just 0.053  
418 when expressed as an ancestry frequency, indicating that this approach can produce LA  
419 estimates that are close to their true values for existing sequencing datasets (*e.g.* Figure 3).  
420 However, the HMM's run time increases dramatically for higher ploidy samples and higher  
421 sequencing depths, a factor that may affect the utility of this program for some analyses.  
422 Nonetheless, for more than 36,000 markers, a sample ploidy of 100 and a mean sequencing  
423 depth of 25, the average runtime was approximately 42 hours. In contrast, for the same set  
424 of parameters, but where individuals are sequenced and analyzed as diploids, the mean  
425 runtime was just 8 minutes (See Supplemental Table S1 for a comparison of run times  
426 across many parameter sets).

427

## 428 **Robustness to Deviations From the Neutral Demographic Model**

429 An important concern is that many biologically plausible admixture models would violate  
430 the assumptions of this inference method. In particular, continuous migration and selection  
431 acting on alleles from one parental population are two potential causes of deviation from  
432 the expected model in the true data. To assess the extent of this potential bias, we  
433 performed additional simulations. First, we considered continuous migration at a constant  
434 rate that began  $t$  generations prior to sampling. In simulations with continuous migration,

435 additional non-recombinant migrants enter the population each generation. Relative to a  
 436 single pulse admixture model, this indicates that the ancestry tract lengths will tend to be  
 437 longer than those under a single pulse admixture model in which all individuals entered at  
 438 time  $t$ . Indeed, we found that admixture times tended to be underestimated with models of  
 439 continuous migration. However, the accuracy of LAI remained high across all situations  
 440 considered here (Table 1), indicating that the LAI aspect of this approach may be robust to  
 441 alternative demographic models.

442

443 **Table 1.** Parameter estimation and LAI when admixture occurs at a constant rate, rather  
 444 than in a single pulse.

| Admixture Time | Migration Rate | Sample Ploidy | Estimated Time | Proportion in 95% CI | Mean 95% CI Width | Mean Posterior Error | Proportion MLE Correct |
|----------------|----------------|---------------|----------------|----------------------|-------------------|----------------------|------------------------|
| 100            | 0.0005         | 1             | 53             | 1.000                | 0.002             | 0.001                | 1.000                  |
|                |                | 2             | 49             | 1.000                | 0.006             | 0.001                | 0.998                  |
|                |                | 10            | 129            | 0.963                | 0.305             | 0.017                | 0.839                  |
|                |                | 20            | 98             | 0.545                | 0.328             | 0.033                | 0.353                  |
|                | 0.001          | 1             | 55             | 1.000                | 0.004             | 0.001                | 0.999                  |
|                |                | 2             | 53             | 1.000                | 0.013             | 0.002                | 0.997                  |
|                |                | 10            | 156            | 0.951                | 0.558             | 0.028                | 0.727                  |
|                |                | 20            | 90             | 0.551                | 0.719             | 0.043                | 0.179                  |
|                | 0.002          | 1             | 54             | 1.000                | 0.006             | 0.002                | 0.999                  |
|                |                | 2             | 52             | 0.999                | 0.019             | 0.003                | 0.996                  |
|                |                | 10            | 123            | 0.949                | 0.758             | 0.035                | 0.671                  |
|                |                | 20            | 74             | 0.679                | 1.115             | 0.045                | 0.176                  |
|                | 0.004          | 1             | 43             | 1.000                | 0.008             | 0.002                | 0.998                  |
|                |                | 2             | 54             | 0.999                | 0.035             | 0.005                | 0.993                  |
|                |                | 10            | 91             | 0.955                | 1.085             | 0.044                | 0.605                  |
|                |                | 20            | 75             | 0.860                | 1.788             | 0.045                | 0.248                  |
| 500            | 0.0005         | 1             | 254            | 0.999                | 0.033             | 0.010                | 0.993                  |
|                |                | 2             | 250            | 0.997                | 0.121             | 0.018                | 0.974                  |
|                |                | 10            | 331            | 0.956                | 1.395             | 0.027                | 0.557                  |
|                |                | 20            | 333            | 0.882                | 2.321             | 0.051                | 0.261                  |
|                | 0.001          | 1             | 266            | 0.999                | 0.049             | 0.014                | 0.990                  |
|                |                | 2             | 268            | 0.996                | 0.198             | 0.027                | 0.962                  |

|       |  |    |     |       |       |       |       |
|-------|--|----|-----|-------|-------|-------|-------|
|       |  | 10 | 325 | 0.967 | 1.887 | 0.063 | 0.521 |
|       |  | 20 | 366 | 0.926 | 3.049 | 0.055 | 0.294 |
| 0.002 |  | 1  | 294 | 0.999 | 0.055 | 0.016 | 0.989 |
|       |  | 2  | 297 | 0.996 | 0.238 | 0.032 | 0.956 |
|       |  | 10 | 352 | 0.977 | 2.076 | 0.064 | 0.542 |
|       |  | 20 | 370 | 0.951 | 3.238 | 0.054 | 0.336 |
| 0.004 |  | 1  | 346 | 0.999 | 0.038 | 0.010 | 0.993 |
|       |  | 2  | 350 | 0.997 | 0.164 | 0.021 | 0.973 |
|       |  | 10 | 403 | 0.989 | 1.634 | 0.045 | 0.692 |
|       |  | 20 | 462 | 0.979 | 2.773 | 0.041 | 0.473 |

445

446 In the second set of simulations, we considered additive selection on alleles that are  
447 perfectly correlated with local ancestry in a given region (*i.e.* selected sites with  
448 frequencies 0 in population 0 and frequency 1 in population 1), and experience relatively  
449 strong selection (selective coefficients were between 0.005 and 0.05). We placed selected  
450 sites at 2, 5, 10 and 20 loci distributed randomly across the simulated chromosome, where  
451 admixture occurred through a single pulse. Ancestry tracts tend to be longer immediately  
452 surrounding selected sites, and we therefore expected admixture time to be  
453 underestimated when selection is widespread. When the number of selected loci was small,  
454 time estimates were nearly unbiased (Table 2), suggesting that our approach can yield  
455 reliable admixture time estimates despite the presence of a small number of selected loci  
456 (*i.e.* 2 selected loci on a chromosome arm). However, with more widespread selection on  
457 alleles associated with local ancestry, time estimates showed a downward bias that  
458 increased with increasing numbers of selected loci. This is likely because selected loci will  
459 tend to be associated with longer ancestry tracts due to hitchhiking. However, the accuracy  
460 of the LAI remains high for all selection scenarios that we considered here, further  
461 indicating that our method can robustly delineate LA, even when the data violate  
462 assumptions of the inference method (Table 1,2).

463

464 **Table 2.** Parameter estimation and LAI when a subset of loci experience natural selection

465 in the admixed population.

| Admixture Time | Migration Rate | Sample Ploidy | Estimated Time | Proportion in 95% CI | Mean 95% CI Width | Mean Posterior Error | Proportion MLE Correct |
|----------------|----------------|---------------|----------------|----------------------|-------------------|----------------------|------------------------|
| 100            | 0.0005         | 1             | 53             | 1.000                | 0.002             | 0.001                | 1.000                  |
|                |                | 2             | 49             | 1.000                | 0.006             | 0.001                | 0.998                  |
|                |                | 10            | 129            | 0.963                | 0.305             | 0.017                | 0.839                  |
|                |                | 20            | 98             | 0.545                | 0.328             | 0.033                | 0.353                  |
|                | 0.001          | 1             | 55             | 1.000                | 0.004             | 0.001                | 0.999                  |
|                |                | 2             | 53             | 1.000                | 0.013             | 0.002                | 0.997                  |
|                |                | 10            | 156            | 0.951                | 0.558             | 0.028                | 0.727                  |
|                |                | 20            | 90             | 0.551                | 0.719             | 0.043                | 0.179                  |
|                | 0.002          | 1             | 54             | 1.000                | 0.006             | 0.002                | 0.999                  |
|                |                | 2             | 52             | 0.999                | 0.019             | 0.003                | 0.996                  |
|                |                | 10            | 123            | 0.949                | 0.758             | 0.035                | 0.671                  |
|                |                | 20            | 74             | 0.679                | 1.115             | 0.045                | 0.176                  |
|                | 0.004          | 1             | 43             | 1.000                | 0.008             | 0.002                | 0.998                  |
|                |                | 2             | 54             | 0.999                | 0.035             | 0.005                | 0.993                  |
|                |                | 10            | 91             | 0.955                | 1.085             | 0.044                | 0.605                  |
|                |                | 20            | 75             | 0.860                | 1.788             | 0.045                | 0.248                  |
|                | 0.0005         | 1             | 254            | 0.999                | 0.033             | 0.010                | 0.993                  |
|                |                | 2             | 250            | 0.997                | 0.121             | 0.018                | 0.974                  |
|                |                | 10            | 331            | 0.956                | 1.395             | 0.027                | 0.557                  |
|                |                | 20            | 333            | 0.882                | 2.321             | 0.051                | 0.261                  |
| 0.001          | 1              | 266           | 0.999          | 0.049                | 0.014             | 0.990                |                        |
|                | 2              | 268           | 0.996          | 0.198                | 0.027             | 0.962                |                        |
|                | 10             | 325           | 0.967          | 1.887                | 0.063             | 0.521                |                        |
|                | 20             | 366           | 0.926          | 3.049                | 0.055             | 0.294                |                        |
| 500            | 0.002          | 1             | 294            | 0.999                | 0.055             | 0.016                | 0.989                  |
|                |                | 2             | 297            | 0.996                | 0.238             | 0.032                | 0.956                  |
|                |                | 10            | 352            | 0.977                | 2.076             | 0.064                | 0.542                  |
|                |                | 20            | 370            | 0.951                | 3.238             | 0.054                | 0.336                  |
| 0.004          | 1              | 346           | 0.999          | 0.038                | 0.010             | 0.993                |                        |
|                | 2              | 350           | 0.997          | 0.164                | 0.021             | 0.973                |                        |
|                | 10             | 403           | 0.989          | 1.634                | 0.045             | 0.692                |                        |
|                | 20             | 462           | 0.979          | 2.773                | 0.041             | 0.473                |                        |

466

467

## 468 **Comparison to WinPop**

469 We next compared the results of our method to those of WinPop [34]. Because WinPop  
470 accepts only diploid genotypes, we provided this program diploid genotype data. However,  
471 for these comparisons, we still ran our method on simulated read pileups with the mean  
472 depth equal to 2. WinPop was originally designed for local ancestry inference in very  
473 recently admixed populations. As expected, WinPop performed acceptably for very short  
474 admixture times, but rapidly decreased in performance with increasing time (Supplemental  
475 Figure S6). However, by default, WinPop removes sites in strong LD within the admixed  
476 samples, which includes ancestral LD, but also admixture LD—the exact signal LAI methods  
477 use to identify ancestry tracts.

478  
479 We therefore reran WinPop, but instead of pruning LD within the admixed population, we  
480 removed sites in strong LD within the ancestral populations as described above in our  
481 method. With this modification, WinPop performs nearly as well as our method, but  
482 remains slightly less accurate especially at longer admixture times (Supplemental Figure  
483 S6). This difference presumably reflects the windowed-based approach of WinPop. At  
484 longer times since admixture a given genomic window may overlap a breakpoint between  
485 ancestry tracts. Although the performance is nearly comparable with this modification, we  
486 emphasize that our method enables users to estimate the time since admixture, where this  
487 must be supplied for WinPop, and allows for LAI on read pileups, therefore incorporating  
488 genotype uncertainty into the LAI procedure. Indeed our method is more accurate at longer  
489 timescales even when supplied with considerably lower quality read data. However  
490 WinPop supports LAI with multiple ancestral populations, which our method currently

491 does not (but see Conclusions). Furthermore many LAI algorithms utilize haplotype  
492 information, which may be particularly valuable in populations where LD extends across  
493 large distances as in *e.g.* human populations.

494

### 495 **Assessing Applications to Human Populations**

496 Given the strong interest in studying admixture and local ancestry in human populations  
497 (*e.g.* [22-25]), it is useful to ask if our method can be applied to data consistent with  
498 admixed populations of humans. Towards that goal, we simulated data similar to what  
499 would be observed in admixture between modern European and African lineages and  
500 applied our HMM to estimate admixture times and LA. We found that our method can  
501 accurately estimate admixture times for relatively short times since admixture, however,  
502 substantially more stringent LD pruning in the reference panels is necessary to produce  
503 unbiased estimates (Figure 4). This may be expected given that linkage disequilibrium  
504 extends across longer distances in human populations than it does in *D. melanogaster*. In  
505 other words, the scales of ancestral LD and admixture LD become similar rapidly in  
506 admixed human populations. Furthermore, this approach yields accurate time estimates  
507 for shorter times since admixture than with genetic data consistent with *D. melanogaster*  
508 populations. For a relatively short time since admixture, around 100 generations, it is  
509 possible to obtain accurate and approximately unbiased estimates of the admixture time  
510 over a wide range of ancestry proportions, indicating that this method may be applicable to  
511 recently admixed human populations as well (Figure 4). Nonetheless, this result  
512 underscores the need to examine biases associated with LD pruning in this approach prior  
513 to application to a given dataset.



514

### 515 **Bias in LAI due to Uncertainty in Time of Admixture**

516 To demonstrate that assumptions about the number of generations since admixture have  
517 the potential to bias LAI, we analyzed a SNP-array dataset from Greenlandic Inuits [60,61].  
518 The authors had previously noted a significant impact of  $t$  on the LAI results produced  
519 using RFMix [24], which we were able to reproduce here for chromosome 10  
520 (Supplemental Figure S7). Indeed, even for comparisons between  $t = 5$  and  $t = 20$ , both of  
521 which may be biologically plausible for these populations, the mean difference in posterior  
522 probabilities between samples estimated using RFMix was 0.0903 (Supplemental Figure  
523 S7). However, when we applied our method to these data, a clear optimum from  $t$  was  
524 obtained at approximately 6-7 generations prior to the present, which is close to the  
525 plausible times of admixture for these populations (Supplemental Figure S7). This  
526 comparison therefore demonstrates that even relatively minor changes in assumptions of  $t$   
527 have the potential to strongly impact LAI results, and underscores the importance of  
528 simultaneously performing LAI while estimating  $t$ .

529

530 However, these results also indicate that our method may not be robust in situations where  
531 the background LD is high and ancestry informative markers are neither common nor  
532 distributed evenly across the genome. When we compared the results of our method at  $t =$   
533 5 and at  $t = 20$ , we also obtained differences in the mean posterior among individuals as  
534 with RFMix. However, one notable difference is that the mean posterior difference using  
535 RFMix has a particularly high variance and therefore higher mean error (Supplemental  
536 Figure S7), but actually a lower median difference than we found using our method. There

537 are likely two causes for differences observed in the mean ancestry posterior among  
538 individuals. First, the datasets considered were generated with a metabochip SNP-chip  
539 [62], which contains a highly non-uniform distribution of markers across the genome.  
540 Second, the ancestral LD in the Inuit population is extensive [61], and we could only retain  
541 a relatively small proportion of the markers after LD pruning in the reference panels. These  
542 results therefore also underscore the challenges of LAI when the signal to noise ratio is low  
543 as may be the case in some human populations, for which LD is extensive, and for some  
544 sequencing strategies.

545

#### 546 **Bias due to Incorrect Estimates of $t$ and $m$**

547 Although in general it is straightforward to estimate  $m$  from genome-wide data, in some  
548 cases this parameter may be misestimated prior to LAI. We therefore sought to quantify  
549 this potential effect by performing LAI after supplying incorrect values of  $m$ . In general, we  
550 found that values close to the true range, *i.e.* within 0.05 of the true  $m$ , tend to yield  
551 reasonably accurate time estimates. However, increasingly incorrect values produce  
552 sharply downwardly biased time estimates and this effect is especially pronounced for  
553 highly skewed true  $m$  (Supplemental Figure S8). As could be expected given the robustness  
554 of LAI to many perturbations (above), when the incorrect  $t$  is supplied to the program, the  
555 LA results remain reasonable. However it is worth noting that the penalty appears to be  
556 greatest when  $t$  is too small rather than too large (Supplemental Figure S9).

557

#### 558 **Estimating Confidence Intervals for $t$**

559 Although this is not a primary focus for this work, for some users it may be of interest to  
560 construct confidence intervals for estimates of  $t$ . We recommend the block bootstrap as the  
561 preferred method for estimating confidence interval for  $t$ , and we have written a script that  
562 will produce these (available on the github page for this project:  
563 [https://github.com/russcd/Ancestry\\_HMM](https://github.com/russcd/Ancestry_HMM)). Simulations confirm that this can produce  
564 confidence intervals overlapping the true  $t$  (Supplemental Figure S10), but bias in  $t$   
565 estimates for higher ploidy samples may still be apparent in some cases.

566

### 567 **Patterns of LA on Inversion Bearing Chromosomes in *D. melanogaster***

568 Given their effects suppressing recombination in large genomic regions, chromosomal  
569 inversions may be expected to strongly affect LAI [2,63]. Although we attempted to limit  
570 the impact of chromosomal inversions by eliminating known polymorphic arrangements  
571 from the reference panels (see methods), many known inversions are present within the  
572 pool-seq samples we aimed to analyze [64]. We therefore focused on known inverted  
573 haplotypes within the DGPR samples [63,65-67], which are comprised of inbred  
574 individuals, and therefore phase is known across the entire chromosome.

575

576 In comparing LA estimates between inverted and standard arrangements, it is clear that  
577 chromosomal inversions can substantially affect LA across the genomes (Figure 5). In  
578 general, the chromosomal inversions considered in this work originated in African  
579 populations of *D. melanogaster* [63], and consistent with this observation, most inversion  
580 bearing chromosomes showed evidence for elevated African ancestry. This was  
581 particularly evident in the regions surrounding breakpoints, where recombination with

582 standard arrangement chromosomes is most strongly suppressed. Importantly, this pattern  
583 continued outside of inversion breakpoints as well, consistent with numerous observations  
584 that recombination is repressed in heterokaryotypes in regions well outside of the  
585 inversion breakpoints in *Drosophila* (e.g. [2,63,68]). In(3R)Mo is an exception to this  
586 general pattern of elevated African ancestry within inverted arrangements (Figure 5). This  
587 inversion originated within a cosmopolitan population [63], and has only rarely been  
588 observed within sub-Saharan Africa [69,70]. Consistent with these observations, In(3R)Mo  
589 displayed lower overall African ancestry than chromosome arm 3R than standard  
590 arrangement chromosomes.

591  
592 Although chromosomal inversions may affect patterns of LA in the genome on this ancestry  
593 cline, we believed including chromosomal inversions in the pool-seq datasets would not  
594 heavily bias our analysis of LA clines. Inversions tend to be low frequency in most  
595 populations studied [64], and because they affect LA in broad swaths of the genome—  
596 sometimes entire chromosome arms—including inversions is unlikely to affect LA cline  
597 outlier identification which appears to affect much finer scale LA (below). Furthermore,  
598 inversion breakpoint regions were not enriched for LA cline outliers in our analysis  
599 (Supplemental Table S2), suggesting that inversions have a limited impact on overall  
600 patterns of local ancestry on this cline. Nonetheless, the LAI complications associated with  
601 chromosomal inversions should be considered when testing selective hypotheses for  
602 chromosomal inversions as genetic differentiation may be related to LA, rather than  
603 arrangement-specific selection in admixed populations such as those found in North  
604 America.

605

## 606 **Application to *D. melanogaster* Ancestry Clines**

607 Finally, we applied our method to ancestry clines between cosmopolitan and African  
608 ancestry *D. melanogaster*. Genomic variation across two ancestry clines have been studied  
609 previously [21,38,40,52]. In particular, the cline on the east coast of North America has  
610 been sampled densely by sequencing large pools of individuals to estimate allele  
611 frequencies, and previous work has shown that the overall proportion of African ancestry  
612 is strongly correlated with latitude [21]. Consistent with this observation, we found a  
613 significant negative correlation for all chromosome arms between proportion of average  
614 African ancestry and latitude ( $\rho = -0.891, -0.561, -0.912, -0.913, \text{ and } -0.755$ , for 2L, 2R,  
615 3L, 3R, and X respectively).

616

617 Although global ancestry proportions have previously been investigated in populations on  
618 this ancestry cline [21,38], these analyses neglected the potentially much richer  
619 information in patterns of LA across the genome. We therefore applied our method to these  
620 samples. Because of the relatively recent dual colonization history of these populations and  
621 subsequent mixing of genomes, a genome-wide ancestry cline is expected [21]. However,  
622 loci that depart significantly in clinality from the genome-wide background levels may  
623 indicate that natural selection is operating on a site linked to that locus.

624

## 625 **LA is Correlated with Recombination Rate**

626 Previously Pool (2015) found that regions of low recombination are disproportionately  
627 enriched for African ancestry in the Raleigh, NC population [17]. Here, we find a similar

628 pattern and we further find that is replicated across all populations that were assayed on  
629 this ancestry cline. Specifically, in all populations studied the proportion of African ancestry  
630 is significantly negatively correlated with local recombination rates (Figure 6). Ultimately,  
631 this correlation may have two causes. First, if selection is more efficient at purging African  
632 alleles in high recombination regions, these loci will tend to be removed preferentially in  
633 those genomic regions. An alternative explanation is that introgressing African alleles that  
634 are favored by selection would tend to bring larger linkage blocks along with them in the  
635 predominantly low recombination regions. Regardless of the specific source of natural  
636 selection, a neutral admixture model would not predict this robust correlation between LA  
637 and recombination rates within all populations, indicating that natural selection has played  
638 an important role in shaping LA on this ancestry cline.

639

#### 640 **Robustness of LAI to Genomic Heterogeneity**

641 Previous studies have found that heterogeneity in the genome with respect to ancestry  
642 informative markers may impact the accuracy of LAI [71]. To assess this possibility, we  
643 computed the mean difference between posterior mean estimates for the two samples from  
644 Florida and between the two samples from Maine. Importantly, because these pooled  
645 samples were created using different isofemale lines [40], this is a conservative test of our  
646 method since there will be true biological differences as well as stochastic sequencing  
647 differences between replicates from each population. We found no correlation between the  
648 mean difference of the posterior means and local recombination rates ( $P = 0.2353$  and  $P =$   
649  $0.7529$ , Spearman's rank correlation for Florida and Maine respectively), indicating that  
650 the correlation observed between local recombination rates and LA is unlikely to be an

651 artifact of differential accuracy of LAI in different genomic regions. However, it should be  
652 acknowledged that in some genomic regions it maybe challenging to unambiguously infer  
653 LA [17,71].

654

### 655 **Outlier LA Clines**

656 Selection within admixed populations may take several distinct forms. On the one hand,  
657 loci that are favorable in the admixed population—either because they are favored on an  
658 admixed genetic background, enhance reproductive success in an admixed population, or  
659 are favorable in the local environment—will tend to achieve higher frequencies, and we  
660 would expect these sites to have a more positive correlation with latitude than the genome-  
661 wide average. Conversely, loci that are disfavored within the admixed population may be  
662 expected to skew towards a more negative correlation with latitude.

663

664 Although it is not possible to distinguish between these hypotheses directly, a majority of  
665 evidence suggests that selection has primarily acted to remove African ancestry from the  
666 largely Cosmopolitan genetic backgrounds found in the Northern portion of this ancestry  
667 cline. First, abundant evidence suggests pre-mating isolation barriers between some  
668 African and cosmopolitan populations [72-74]. Second, there is strong post-mating  
669 isolation between populations on the ends of this cline [46,47]. Third, we report here a  
670 strong negative correlation between LA frequency and local recombination rates (above).  
671 Finally, circumstantially, the local environment on the east coast of North America is  
672 perhaps most similar to the environment of Cosmopolitan compared to African ancestral  
673 populations, which further suggests that Cosmopolitan alleles are likely favored through

674 locally adaptive mechanisms. For these reasons, we therefore examined loci that are  
675 outliers for a negative partial correlation with latitude, as this is the expected pattern for  
676 African alleles that are disfavored in more temperate populations. In other words, the  
677 outlier regions show a significantly stronger negative correlation between local African  
678 ancestry and latitude than the chromosome arm does on average.

679  
680 There is an ongoing debate about the relative merits of an outlier approach versus more  
681 sophisticated models for detecting and quantifying selection in genome-wide scans. We  
682 believe that the difficulties of accurately estimating demographic parameters for this  
683 ancestry cline make the outlier approach most feasible for our purposes. Using our outlier  
684 approach, we identified 80 loci that showed the expected negative partial correlation with  
685 latitude (Figure 7). Although the specific statistical threshold that we employed is  
686 admittedly arbitrary, given the strength of evidence indicating widespread selection on  
687 local ancestry in this species (above), we expected that the tail of the LA cline distribution  
688 would be enriched for the genetic targets of selection.

689

### 690 **Differences Among Chromosome Arms**

691 Due to the differences in inheritance, evolutionary theory predicts that selection will  
692 operate differently on the X chromosome relative to autosomal loci. Of specific relevance to  
693 this work, the large-X effect [75,76] is the observation that loci on the X chromosome  
694 contribute to reproductive isolation at a disproportionately high rate. Additionally, and  
695 potentially the cause of the large-X effect, due to the hemizyosity of X-linked loci, the X  
696 chromosome is expected to play a larger role in adaptive evolution, the so-called faster-X



697 effect [77]. There is therefore reason to believe that the X chromosome will play a  
698 significant role in genetically isolating Cosmopolitan and African *D. melanogaster*.  
699  
700 Consistent with a larger role for the sex chromosomes in generating reproductive isolation  
701 or selective differentiation between *D. melanogaster* ancestral populations, we found that  
702 that the X chromosome has a lower mean African ancestry proportion than the autosomes  
703 in all populations. Furthermore, the X displays a stronger correlation between local  
704 recombination rates and the frequency of African ancestry than the autosomes in all 14  
705 populations samples, potentially indicating that selection has had a disproportionately  
706 strong effect shaping patterns of local ancestry on this chromosome than on the autosomes.  
707 In addition, the X has a significantly higher rate of outlier LA clinal loci than the autosomes  
708 (23 LA outliers on the X, 57 on the Autosomes,  $p = 0.0341$ , one-tailed exact Poisson test).  
709 Although consistent with evolutionary theory, differences between autosomal arms and the  
710 X chromosome may also be explained in part by differences in effective recombination  
711 rates on the X chromosome than the autosomes, differences in power to identify LA clines  
712 associated with chromosome arm specific patterns, or by the disproportionately larger  
713 number of chromosomal inversions on the autosomes than on the X chromosome in these  
714 populations [64,69]. Distinguishing between this hypothesis and confounding factors will  
715 be central to determining whether key results from speciation research are replicated in  
716 much more recently diverged populations.

717

718 **Biological Properties of Outlier LA Clinal Loci**

719 We next applied gene ontology analysis to the set of outlier genes to identify common  
720 biological attributes that may suggest more specific organismal phenotypes underlying LA  
721 clinal outliers. In total, we identified seven GO terms that remained significant after  
722 applying a 5% FDR correction (Table S3). These GO terms reflect the presence of two  
723 primary clusters of genes. The first, which corresponds broadly to histone acetylation, may  
724 be related to chromatin remodeling and therefore is expected to effect gene expression  
725 levels across a large number of loci. Previous work focused on this ancestry cline has  
726 identified chromatin remodeling genes as a potentially important component locally  
727 adaptive variation on this ancestry cline [78]. This may indicate that this previous efforts to  
728 identify spatially varying selection in these populations may have been detecting selection  
729 on local ancestry components associated with ecological adaptation in ancestral  
730 populations. The second GO cluster, eukaryotic translation initiation factor 2 complex, also  
731 appears to implicate a central role of clinal LA outliers on the regulation of gene expression.  
732 One plausible explanation of these observations is that gene expression, particularly high  
733 level regulation of gene expression, may be especially likely to contribute to epistatic  
734 interactions as these proteins will inherently interact with a diverse set of loci throughout  
735 the genome. Given that two distinct gene clusters related to gene expression are identified  
736 by this analysis, gene expression would appear to be a plausible candidate phenotype to  
737 investigate in future work on ecological divergence and isolating factors in admixed *D.*  
738 *melanogaster* populations. Testing this prediction empirically through expression profiling  
739 may therefore offer fruitful grounds of understanding the earliest stages of reproductive  
740 isolation.  
741

## 742 **Regions of Decreased African Ancestry**

743 Another subset of loci that we may wish to identify using these data are those that  
744 contribute to reproductive isolation between African and Cosmopolitan *D. melanogaster*  
745 populations and would therefore be removed by selection from most populations on this  
746 ancestry cline. Although it is possible that Cosmopolitan alleles would be disfavored in an  
747 admixed background as well, because these populations are predominantly Cosmopolitan,  
748 we expect that the majority of selection on negatively epistatically interacting loci would  
749 remove African alleles from populations. To identify these loci, we first computed the mean  
750 African ancestry across all populations, and we then identified the subset of loci that were  
751 in the lowest 5% tail. From those loci, we selected the loci minima from adjacent genomic  
752 windows (see Methods, Figure 8), and we obtained a total of 84 local ancestry outliers.

753  
754 As with the clinal outlier analysis above, to identify commonalities in the types of loci  
755 identified by this analysis, we performed GO analysis on the set of loci that are outliers for  
756 the mean proportion of African ancestry. After a 5% FDR correction, there are again several  
757 gene clusters that are significantly enriched in this set of outlier loci (Supplemental Table  
758 S4). Of particular interest is the GO term oogenesis, which may indicate that female  
759 reproduction is affected during admixture between cosmopolitan and African populations  
760 of *D. melanogaster*. This finding is particularly interesting in light of the fact that female  
761 fertility is strongly affected when autosomal chromosomes from one end of this ancestry  
762 cline are made homozygous on a genetic background carrying the X chromosome from the  
763 other end of this ancestry cline [47]. Hence, the effects of combining divergence ancestry  
764 types on female fertility, and specifically the genetic basis of oogenesis, may be an

765 appealing phenotype to characterize in detail in attempting to clarify the genetic effects  
766 that isolate African and Cosmopolitan *D. melanogaster* populations.

767

### 768 **Candidate Behavioral Reproductive Isolation Genes**

769 Given the abundance of evidence supporting a role for pre-mating isolation barriers  
770 between African and Cosmopolitan flies [72-74], we are interested in highlighting genes  
771 potentially related to behavioral isolation between ancestral populations of *D.*  
772 *melanogaster*. Consistent with this observation, one of the strongest LA cline outliers, *egh*,  
773 has been conclusively linked to strong effects on male courtship behavior using a variety of  
774 genetic techniques [79]. Additionally, gene knockouts of CG43759, another LA cline outlier  
775 locus, have strong effects on inter-male aggressive behavior [80], and may also contribute  
776 to behavioral differences between admixed individuals. These loci are therefore appealing  
777 candidate genes for functional follow-up analyses, and illustrate the power of this LAI  
778 approach for identifying candidate genes that are potentially associated with well  
779 characterized phenotypic differences between ancestral populations.

780

### 781 **Little Evidence for Seasonal LA Outliers**

782 The Pennsylvania population included in this study has been sampled extensively,  
783 including several paired fall and spring samples across three consecutive years. Previously,  
784 Bergland et al. [40] identified numerous SNPs that showed recurrent and rapid seasonal  
785 frequency changes in the Pennsylvania populations included in this study. They concluded  
786 that these sites are experiencing recurrent selection associated with recurrent  
787 environmental seasonal changes. To determine if LA across the *D. melanogaster* genome

788 might also experience selection associated with seasonal frequency shifts, we searched for  
789 loci that showed a strong recurrent seasonal shift in LA. However, we identified fewer  
790 significantly seasonal sites than we would expect to by chance (the proportion of  
791 significant site at the  $\alpha = 0.05$  level of significance is 0.041). Furthermore, after  
792 applying a false discovery rate correction [81], there are no sites that are significantly  
793 seasonal at the  $q = 0.1$  level. Collectively, these results indicate that LA within the  
794 Pennsylvania populations of *D. melanogaster* remains remarkably stable during seasonal  
795 environmental cycles.

796  
797 Although this observation may, to a first approximation, appear to be at odds with the  
798 results reported in Bergland et al. [40], we believe that it is consistent with the model  
799 proposed in that work. Specifically, the authors suggested that long term balancing  
800 selection may maintain these seasonally favorable polymorphisms in diverse *D.*  
801 *melanogaster* populations and even in the ancestors of *D. melanogaster* and *D. simulans*  
802 [40]. We therefore may expect that these polymorphisms will be maintained at similar  
803 frequencies in African and Cosmopolitan populations. Hence, although the seasonal SNPs  
804 change rapidly in frequency between spring and fall [40], the LA at these sites can remain  
805 stable during seasonal fluctuations.

806

## 807 **Conclusion**

808 A growing number of next-generation sequencing projects produce low coverage data that  
809 cannot be used to unambiguously assign individual genotypes, but which can be analyzed  
810 probabilistically to account for uncertainty in individual genotypes [82-84]. However, most

811 existing LAI methods require genotype data derived from diploid individuals. Hence, there  
812 is an apparent disconnect between existing LAI approaches and the majority of ongoing  
813 sequencing efforts. In this work, we developed the first framework for applying LAI to  
814 pileup read data, rather than genotypes, and we have generalized this model to arbitrary  
815 sample ploidies. This method therefore has immediate applications to a wide variety of  
816 existing and ongoing sequencing projects, and we expect that this approach and extensions  
817 thereof will be valuable to a number of researchers. Although evaluating this application is  
818 beyond the scope of this work, one particularly enticing potential use of this method is LAI  
819 in ancient DNA samples for which sequencing depths often preclude accurate genotype  
820 calling. Importantly, it would be straightforward to model site-specific errors in this  
821 framework, which could be particularly important for ancient DNA applications [6].

822  
823 For many applications, a parameter of central biological interest is the time since  
824 admixture began ( $t$ ). A wide variety of approaches have been developed that aim to  
825 estimate  $t$  and related parameters in admixed populations [26,28-31,85,86]. Many of these  
826 methods are based on an inferred distribution of tract lengths, however, inference of the  
827 ancestry tract length distribution is associated with uncertainty that is typically not  
828 incorporated in currently available methods for estimating  $t$ . Furthermore, incorrect  
829 assumptions regarding  $t$  have the potential to introduce biases during LAI. Hence, it is  
830 preferable to estimate demographic parameters such as the admixture time during the LAI  
831 procedure. Nonetheless, as noted above, although LAI using our method is robust to many  
832 deviations from the assumed model, admixture time estimates are sensitive to a variety of  
833 potential confounding factors and examining the resulting ancestry tract distributions after

834 LAI may be necessary to confirm that the assumed demographic model provides a  
835 reasonable fit to the data.

836  
837 To our knowledge, this is the first method that attempts to simultaneously link LAI and  
838 population genetic parameter estimation directly, and we can envision many extensions of  
839 this approach that could expand the utility of this method to a broad variety of applications.  
840 For example, it is straightforward to accommodate additional reference populations (*e.g.*  
841 by assuming multinomial rather than binomial read sampling). Alternatively, any  
842 demographic or selective model that can be approximated as a Markov process could be  
843 incorporated—in particular, it is feasible to accommodate two-pulse admixture models and  
844 possibly models including ancestry tracts that are linked to positively selected sites. Such  
845 methods can be used to construct likelihood ratio tests of evolutionary models and for  
846 providing improved parameter estimates.

847

## 848 **Methods**

### 849 **Constructing Emissions Probabilities**

850 We model the ancestry using an HMM  $\{H_v\}$  with state space  $S = \{0, 1, \dots, n\}$ , where  $H_v = i$ ,  
851  $i \in S$ , indicates that in the  $v$ th position  $i$  chromosomes are from population 0 and  $n - i$   
852 chromosomes are from population 1. In the following, to simplify the notation and without  
853 loss of generality, we will omit the indicator for the position in the genome as the structure  
854 of the model is the same for all positions of equivalent ploidy. We assume each variant site  
855 is biallelic, with two alleles  $A$  and  $a$ , and the availability of reference panels from source  
856 populations 0 and 1 with total allelic counts  $C_{0a}$ ,  $C_{1a}$ ,  $C_{0A}$ , and  $C_{1A}$ , where the two subscripts

857 refer to population identity and allele, respectively. Also,  $C_0 = C_{0A} + C_{0a}$  and  $C_1 = C_{1A} + C_{1a}$ .  
858 Finally, we also assume we observe a pileup of  $r$  reads from the focal population, with  $r_A$   
859 and  $r_a$  reads for alleles  $A$  and  $a$  respectively ( $r = r_A + r_a$ ). The emission probability of state  
860  $i \in S$  of the process is then defined as  $e_i = \Pr(r_A, C_{0A}, C_{1A} \mid r, C_0, C_1, H = i, \varepsilon)$ , where  
861  $\varepsilon$  is an error rate. This probability can be calculated by summing over all possible  
862 genotypes in the admixed sample and over all possible population identities of the reads, as  
863 explained in the following section.

864  
865 The probability of obtaining  $r_0 (= r - r_1)$  reads, in the admixed population, from  
866 chromosomes of ancestry 0, given  $r$  and the hidden state  $H = i$ , and assuming no mapping or  
867 sequencing biases, is binomial,

868 
$$(1) \quad r_0 \mid H = i, n, r \sim \text{Bin}(r, i/n)$$

869  
870 These probabilities are pre-computed in our implementation for all possible values of  $i \in S$   
871 and  $r_0, 0 \leq r_0 \leq r$ . Similarly, for the reference populations, for  $j=0,1$ ,

872  
873 
$$(2) \quad C_{jA} \mid C_j, f_j \sim \text{Bin}(C_j, f_j)$$

874  
875 where  $f_j$  is the allele frequency of allele  $A$  in population  $j$ . The analogous allelic counts in the  
876 admixed population, denoted  $C_{M0a}$ ,  $C_{M1a}$ ,  $C_{M0A}$ , and  $C_{M1A}$ , are unobserved (only reads are  
877 observed for the admixed population), but are also conditionally binomially distributed,  
878 *i.e.*:



879

880 
$$(3) C_{M0A} | H = i, f_0 \sim \text{Bin}(i, f_0) \text{ and } C_{M1A} | H = i, n, f_1 \sim \text{Bin}(n - i, f_1)$$

881

882 Finally, in the absence of errors, and assuming no sequencing or mapping biases, the

883 conditional probability of obtaining  $r_{0A}$  reads of allele  $A$  in the admixed population is

884

885 
$$(4) r_{0A} | H = i, r_0, C_{M0A} \sim \text{Bin}(r_0, C_{M0A} / i)$$

886

887 It should be noted that because we are explicitly modeling the process of sampling alleles

888 from the population (Equation 3) and the process of sampling reads conditional on the

889 sample allele frequencies (Equation 4), that this approach corrects for the increased

890 variance associated with two rounds of binomial sampling in poolseq applications that has

891 been reported previously (*e.g.*, in [52]).

892

893 This probability can be expanded to include errors, in particular assuming a constant and

894 symmetric error rate  $\epsilon$  between major and minor allele, and assuming all reads with

895 nucleotides that are not defined as major or minor are discarded, we have

896

897 
$$(5) \epsilon_{0\epsilon} | \epsilon = \epsilon, \epsilon_{\epsilon}, \epsilon_{\epsilon\epsilon}, \epsilon \sim \text{Bin}(\epsilon_0, (1 - \epsilon)\epsilon_{\epsilon\epsilon} / \epsilon + \epsilon(1 - \epsilon_{\epsilon\epsilon} / \epsilon)).$$

898

899 Using these expressions, and integrating over allele frequencies in the source populations,

900 we have

901 
$$(6) \Pr(\alpha_{0\alpha}, \beta_{0\alpha} | \alpha_0, \beta_0, \alpha, \beta = \alpha, \varepsilon) =$$

902 
$$\int_0^1 \sum_{\alpha=0}^{\alpha} \Pr(\alpha_{0\alpha} | \alpha = \alpha, \beta_0, \beta_{0\alpha} = \alpha, \beta) \Pr(\beta_{0\alpha} = \alpha | \alpha = \alpha, \beta_0) \alpha (\alpha_0) \beta \alpha_0 =$$

903

904 
$$(7) \frac{\alpha_0! \beta!}{(\alpha_0 - \alpha_{0\alpha})! \alpha_{0\alpha}! (\alpha_0 + \alpha + 1)!} \sum_{\alpha=0}^{\alpha} \Pr(\alpha_{0\alpha} | \alpha = \alpha, \beta_0, \beta_{0\alpha} = \alpha, \beta) \frac{(\alpha_0 - \alpha_{0\alpha} + \alpha - \alpha)! (\alpha_{0\alpha} + \alpha)!}{(\alpha - \alpha)! \alpha!}$$

905

906

907 assuming a uniform [0, 1] distribution for  $f_0$ . A similar expression is obtained for

908  $\Pr(\alpha_{1\alpha}, \beta_{1\alpha} | \alpha_1, \beta_1, \alpha, \beta = \alpha, \varepsilon)$ , assuming  $f_1 \sim U[0, 1]$ , and these expressions combine

909 multiplicatively to give

910

911 
$$(8) \Pr(\alpha_{\alpha}, \beta_{1\alpha}, \alpha_{0\alpha} | \alpha_0, \beta_0, \alpha_1, \beta_1, \alpha, \beta = \alpha, \varepsilon) =$$

912 
$$\sum_{\alpha_{0\alpha} = \max\{0, \alpha_{\alpha} - \alpha_1\}}^{\min\{\alpha_{\alpha}, \alpha_{\alpha}\}} \Pr(\alpha_{0\alpha}, \beta_{0\alpha} | \alpha_0, \beta_0, \alpha, \beta = \alpha, \varepsilon) \Pr(\alpha_{1\alpha} =$$

913 
$$\alpha_{\alpha} - \alpha_{0\alpha}, \beta_{1\alpha} | \alpha_1, \beta_1, \alpha, \beta = \alpha, \varepsilon),$$

914

915 and the emission probabilities become

916

917 
$$(9) \Pr(r_A, C_{0A}, C_{1A} | r, C_0, C_1, H = i, \varepsilon) =$$

$$\sum_{\alpha_0=0}^{\alpha} \Pr(\alpha_0 | \alpha = \alpha, \beta, \beta) \Pr(\alpha_{\alpha}, \beta_{1\alpha}, \alpha_{0\alpha} | \alpha_0, \beta_0, \alpha_1 = \alpha - \alpha_0, \beta_1, \alpha, \beta = \alpha, \varepsilon)$$

918

919 Alternatively, if the sample genotypes are known with high confidence, i.e.  $C_{MA} = C_{M0A} + C_{M1A}$

920 is observed, the emission probabilities are the defined as

921  
922

(10)

$$\begin{aligned}
 & \Pr(C_{MA}, C_{0A}, C_{1A} | C_0, C_1, n, H = i) = \\
 923 \quad & \binom{C_0}{C_{0A}} \binom{C_1}{C_{1A}} \sum_{k=\max\{C_{MA}-i, 0\}}^{\min\{n-i, C_{MA}\}} \int_0^1 \binom{n-i}{k} (f_0)^{C_{0A}+k} (1-f_0)^{C_0+n-i-C_{0A}-k} df_0 \int_0^1 \binom{i}{C_{MA}-k} (f_1)^{C_{MA}-k+C_{1A}} (1-f_1)^{C_1+i-C_{1A}-C_{MA}+k} df_1 \\
 & = \sum_{k=\max\{C_{MA}-i, 0\}}^{\min\{n-i, C_{MA}\}} \frac{C_0! C_1! i! (n-i)! (C_{MA} + C_{1A} - k)! (C_{0A} + k)! (C_1 - C_{MA} - C_{1A} + i + k)! (C_0 - C_{0A} - i - k + n)!}{(C_0 - C_{0A})! C_{0A}! (C_1 - C_{1A})! C_{1A}! (C_{MA} - k)! k! (k + i - C_{MA})! (n - k - i)! (n - i + C_0 + 1)! (i + C_1 + 1)!}
 \end{aligned}$$

924

925 These emissions probabilities are sometimes substantially faster to compute than those for  
 926 short read pileups, especially when sequencing depths are high. However, the genotypes must  
 927 be estimated with high accuracy for this approach to be valid. For applications with low read  
 928 coverage, or with ploidy >2 for which many standard genotype callers are not applicable, it is  
 929 usually preferable to use the pileup-based approach described above.

930

### 931 **Constructing Transition Probabilities**

932 We assume an admixed population, of constant size, with  $N$  diploid individuals, in which a  
 933 proportion  $m$  of the individuals in the population where replaced with migrants  $t$   
 934 generations before the time of sampling. Given these assumptions, and an SMC' model of  
 935 the ancestral recombination graph [87], the rate of transition from ancestry 0 to 1, along  
 936 the length of a single chromosome, is

937

$$\lambda_0 = 2Nm \left( 1 - e^{\frac{-t}{2N}} \right)$$

938 (11)

939

940 per Morgan [57]. Similarly, the rate of transition from ancestry 1 to 0 on a single

941 chromosome is

942

$$(12) \quad \lambda_1 = 2N(1-m) \left( 1 - e^{-\frac{t}{2N}} \right)$$

944

945 per Morgan. Importantly, because these expressions are based on a coalescence model,

946 they account for the possibility that a recombination event occurs between two tracts of

947 the same ancestry type and the probability that the novel marginal genealogy will back-

948 coalesce with the previous genealogy [57]. Both events are expected to decrease the

949 number of ancestry switches along a chromosome and ignoring their contribution will

950 cause overestimation of the rate of change between ancestry types between adjacent

951 markers.

952

953 The transition rates are in units per Morgan, but can be converted to rates per bp, by

954 multiplying with the recombination rate in Morgans/bp,  $r_{bp}$  within a segment. The

955 transition probabilities of the HMM for a single chromosome,  $\mathbf{P}(l) = \{P_{ij}(l)\}$ ,  $i, j \in S$ , between

956 two markers with a distance  $l$  between each other, is then approximately

957

$$(13) \quad \mathbf{P}(l) = \left[ \begin{array}{cc} 1 - \lambda_0 r_{bp} & \lambda_0 r_{bp} \\ \lambda_1 r_{bp} & 1 - \lambda_1 r_{bp} \end{array} \right]^l$$

959

960 using discrete distances, or

961

962

963

$$(14) \quad \mathbf{P}(l) = \begin{bmatrix} \frac{\lambda_1}{\lambda_0 + \lambda_1} + \frac{\lambda_0}{\lambda_0 + \lambda_1} e^{-r_{bp}l(\lambda_0 + \lambda_1)} & \frac{\lambda_0}{\lambda_0 + \lambda_1} - \frac{\lambda_0}{\lambda_0 + \lambda_1} e^{-r_{bp}l(\lambda_0 + \lambda_1)} \\ \frac{\lambda_0}{\lambda_0 + \lambda_1} + \frac{\lambda_1}{\lambda_0 + \lambda_1} e^{-r_{bp}l(\lambda_0 + \lambda_1)} & \frac{\lambda_1}{\lambda_0 + \lambda_1} - \frac{\lambda_1}{\lambda_0 + \lambda_1} e^{-r_{bp}l(\lambda_0 + \lambda_1)} \end{bmatrix}$$

964

965 using continuous distances along the chromosome. Here, we use the continuous  
966 representation for calculations. We emphasize that the assumption of a Markovian process  
967 is known to be incorrect [57], in fact admixture tracts tend to be more spatially correlated  
968 than predicted by a Markov model, and the degree and structure of the correlation depends  
969 on the demographic model [57]. Deviations from a Markovian process may cause biases in  
970 the estimation of parameters such as  $t$ .

971

972 The Markov process defined above is applicable to a single chromosome. We now want to  
973 approximate a similar process for a sample of  $n$  chromosomes from a single sequencing  
974 pool. The true process is quite complicated, and we choose for simplicity to approximate  
975 the process for  $n$  chromosomes sampled from one population, as the union of  $n$   
976 independent chromosomal processes. We will later quantify biases arising due to this  
977 independence assumption using simulations. Under the independence assumption, the  
978 transition probability from  $i$  to  $j$  is simply the probability of  $l$  transitions from state 1 to

979 state 0 in the marginal processes and  $j - i + l$  transitions from state 0 to state 1, summed  
980 over all admissible values of  $l$ , i.e.,

981

$$982 \quad \Pr(H_{v+k} = j | H_v = i) = \sum_{l=\max\{0, i-j\}}^{\min\{n-j, i\}} \binom{n-i}{j-i+l} (P_{01}(k))^{j-i+l} (1-P_{01}(k))^{n-j+i-l} \binom{i}{l} (P_{10}(k))^l (1-P_{10}(k))^{i-l}$$

(15)

983

984 Although this procedure can be computationally expensive when there are many markers,  
985 read depths are high, and especially when  $n$  is large, in our implementation, we reduce the  
986 compute time by pre-calculating and storing all binomial coefficients.

987

## 988 **Estimating Time Since Admixture**

989 A parameter of central biological interest, that is often unknown in practice, is the time  
990 since the initial admixture event ( $t$ ). We therefore use the HMM representation to provide  
991 maximum likelihood estimates of  $t$  using the forward algorithm to calculate the likelihood  
992 function. As this is a single parameter optimization problem for a likelihood function with a  
993 single mode, optimization can be performed using a simple golden section search [88].

994 Default settings for this optimization in our software, including the search range maxima  
995 defaults,  $t_{max}$  and  $t_{min}$ , are documented in the C++ HMM source code provided at  
996 [https://github.com/russcd/Ancestry\\_HMM](https://github.com/russcd/Ancestry_HMM).

997

## 998 **Posterior Decoding**

999 After either estimating or providing a fixed value of the time since admixture to the HMM,  
1000 we obtained the posterior distribution for all variable sites considered in our analysis using

1001 the forward-backward algorithm, and we report the full posterior distribution for each  
1002 marker along the chromosome.

1003

#### 1004 **Simulating Ancestral Polymorphism**

1005 To validate our HMM, we generated sequence data for each of two ancestral populations  
1006 using the coalescent simulator MACS [55]. We sought to generate data that could be  
1007 consistent with that observed in Cosmopolitan and African populations of *D. melanogaster*,  
1008 which has been studied previously in a wide variety of contexts [2,11,35-37]. We used the  
1009 command line “macs 400 10000000 -i 1 -h 1000 -t 0.0376 -r 0.171 -c 5 86.5 -I 2 200 200 0 -  
1010 en 0 2 0.183 -en 0.0037281 2 0.000377 -en 0.00381 2 1 -ej 0.00382 2 1 -eN 0.0145 0.2” to  
1011 generate genotype data. This will produce 200 samples of ancestry 0 and 200 samples of  
1012 ancestry 1 on a 10mb chromosome—*i.e.* this should resemble genotype data for about half  
1013 of an autosomal chromosome arm in *D. melanogaster*. Unless otherwise stated below, we  
1014 then sampled the first 50 chromosomes from each ancestral population as the ancestral  
1015 population reference panel, whose genotypes are assumed to be known with low error  
1016 rates. The sample size was chosen because it is close to the size of the reference panel that  
1017 we obtained in our application of this approach to *D. melanogaster* (below).

1018

1019 To evaluate the performance of our method on data consistent with human populations, we  
1020 simulated data that could be consistent with that observed for modern European and  
1021 African human populations. Specifically, we simulated the model of [89] using the  
1022 command line “macs 200 1e8 -I 3 100 100 0 -n 1 1.682020 -n 2 3.736830 -n 3 7.292050 -eg  
1023 0 2 116.010723 -eg 1e-12 3 160.246047 -ma x 0.881098 0.561966 0.881098 x 2.797460

1024 0.561966 2.797460 x -ej 0.028985 3 2 -en 0.028986 2 0.287184 -ema 0.028987 3 x

1025 7.293140 x 7.293140 x x x x x -ej 0.197963 2 1 -en 0.303501 1 1 -t 0.00069372 -r

1026 0.00069372". Admixture between ancestral populations was then simulated as described

1027 below.

1028

### 1029 **Simulating Admixed Populations**

1030 Although it is commonly assumed that admixture tract lengths can be modeled as  
1031 independent and identically distributed exponential random variables (e.g. [26,29] and in  
1032 this work, above), this assumption is known to be incorrect as ancestry tracts are neither  
1033 exponentially distributed, independent across individuals, nor identically distributed along  
1034 chromosomes [57]. We therefore aim to determine what bias violations of this assumption  
1035 will have on inferences obtained from this model. Towards this, we used SELAM [56] to  
1036 simulate admixed populations under the biological model described above. Because this  
1037 program simulated admixture in forward time, it generates the full pedigree-based  
1038 ancestral recombination graph, and is therefore a conservative test of our approach  
1039 relative to the coalescent which is known to produce incorrect ancestry tract distributions  
1040 for short times [57]. Briefly, we initialized each admixed population simulation with a  
1041 proportion,  $m$ , of ancestry from ancestral population 1, and a proportion  $1-m$  ancestry from  
1042 ancestral population 0. Unless otherwise stated, all simulations were conducted with  
1043 neutral admixture and a hermaphroditic diploid population of size 10,000.

1044

1045 We then assigned the additional, non-reference chromosomes from the coalescent

1046 simulations, to each ancestry tract produced in SELAM simulations according to their local



1047 ancestry along the chromosome. In this way, each chromosome is a mosaic of the two  
1048 ancestral subpopulations. See, *e.g.* [2], for a related approach for simulating genotype data  
1049 of admixed chromosomes.

1050

### 1051 **Pruning Ancestral Linkage Disequilibrium**

1052 Correlations induced by LD between markers within ancestral populations violates a  
1053 central assumption of the Markov model framework. Although it may be feasible to  
1054 explicitly model linkage within ancestral populations (*e.g.*, [24,25]), when ancestral  
1055 populations have relatively little LD, such as those of *D. melanogaster*, another effective  
1056 approach is to discard sites that are in strong LD in the ancestral populations. Hence, to  
1057 avoid this potential confounding aspect of the data, we first computed LD between all pairs  
1058 of markers within each reference panel that are within 0.01 centimorgans of one another.  
1059 We then discarded one of each pair of sites where  $|r|$  in either reference panel exceeded a  
1060 particular threshold, and we decreased this threshold until we obtained an approximately  
1061 unbiased estimate of the time since admixture estimates of the HMM. This approach differs  
1062 from a previous method, WinPop [34], where LD is pruned from within admixed samples  
1063 (see also below).

1064

### 1065 **Simulating Sequence Data**

1066 We first identified all sites where the allele frequencies of the ancestral populations differ  
1067 by at least 20% within the reference panels. We excluded weakly differentiated sites to  
1068 decrease runtime and because these markers carry relatively little information about the  
1069 LA at a given site. Then, to generate data similar to what would be produced using Illumina

1070 sequencing platforms, we simulated allele counts for each sample, by first drawing the  
1071 depth at a given site from a Poisson distribution. In most cases and unless otherwise stated,  
1072 the mean of this distribution is set to be equal to the sample ploidy. We did this to ensure  
1073 equivalent sequencing depth per chromosome regardless of pooling strategy, and because  
1074 this depth is sufficiently low that high quality genotypes cannot be determined. We then  
1075 generated set of simulated aligned bases via binomial sampling from the sample allele  
1076 frequency and included a uniform error rate of 1% for both alleles at each site.

1077  
1078 Unless otherwise stated, we simulated a total of 40 admixed chromosomes. The HMM can  
1079 perform LAI on more than one sample at a time, and we therefore included all samples  
1080 when running it. Hence, we used 40 haploid, 20 diploid, 4 pools of 10 chromosomes, and 2  
1081 pools of 20 chromosomes for most comparisons of accuracy reported below, unless  
1082 otherwise stated. It is worth noting that it is possible to jointly analyze distinct samples  
1083 from the same subpopulation that have been sequenced at different ploidies.

1084

### 1085 **Simulating Divergent Ancestral Populations**

1086 To investigate the effects of allele frequency differences between reference populations and  
1087 admixed populations, we performed coalescent simulations using the software MACS [55],  
1088 using the command line “./macs 500 10000000 -i 1 -h 1000 -t 0.0376 -r 0.171 -c 5 86.5 -l 8  
1089 100 100 50 50 50 50 50 0 -en 0 2 0.183 -en 0.0037281 2 0.000377 -en 0.00381 2 1 -ej  
1090 0.00382 2 1 -eN 0.0145 0.2 -ej 0.0005 3 2 -ej 0.000500001 4 1 -ej 0.001 5 2 -ej  
1091 0.001000001 6 1 -ej 0.002 7 2 -ej 0.002000001 8 1”. This might be expected to produce  
1092 populations that are differentiated similarly to how populations of *D. melanogaster* would

1093 be across European populations or between populations in Central Africa. We then  
1094 substituted the increasingly divergent populations for the reference panel. All allele  
1095 frequency differences and LD pruning were performed as described above on each of the  
1096 substitute reference panels.

1097

### 1098 **Accuracy Statistics**

1099 To evaluate the performance of the HMM, we computed four statistics. First, we compute  
1100 the proportion of sites where the true state is within the 95% posterior credible interval,  
1101 where ideally, this proportion would be equal to or greater than 0.95. As this HMM has  
1102 discrete states, there are many ways the 95% credible interval could be defined. In light of  
1103 the fact that the credible interval tends to be narrow (Results), we defined the interval to  
1104 include all states that are overlapped, by any amount, in the 95% confidence interval of the  
1105 posterior distribution. Second, we compute the mean posterior error, the average distance  
1106 between the posterior distribution of hidden states and the true state

1107

$$E = \frac{\sum_{v=0}^S \sum_{i=0}^n p(H_v = i | \mathbf{r}) |i - I_v|}{Sn}$$

1109

1110 Here  $S$  is the total number of sites,  $I_v$  is the true state at site  $v$ , and  $\mathbf{r}$  is all the combined read  
1111 data. Third, we also report the proportion of sites where the maximum likelihood estimate  
1112 of the hidden state is equal to the true ancestry state. Finally, as an indicator of the  
1113 specificity of our approach, we also report the average width of the 95% credible interval.

1114

## 1115 **Deviations from the Assumed Neutral Demographic Model**

1116 A potential issue with this framework is that the assumptions underlying the transition  
1117 matrixes and related time of admixture estimation procedure is likely to be violated in a  
1118 number of biologically relevant circumstances. We therefore simulated populations  
1119 wherein individuals of ancestral population 1 began entering a population entirely  
1120 composed of individuals from ancestral population 0, at a time  $t$  generations before the  
1121 present, at a constant rate that is sustained across all subsequent generations until the time  
1122 of sampling. That is, additional unadmixed individuals of ancestry 1 migrate each  
1123 generation from  $t$  until the present.

1124

1125 Natural selection acting on admixed genetic regions has been inferred in a wide variety of  
1126 systems (*e.g.* [5,7,13,17,18]), and is expected to have pronounced effects on the distribution  
1127 of LA among individuals within admixed populations. Here again, this aspect of biologically  
1128 realistic populations will tend to violate central underlying assumptions of the model  
1129 assumed in this work. Towards this, we simulated admixed populations with a single pulse  
1130 of admixture  $t$  generations prior to the time of sampling. We then incorporated selection at  
1131 2,5,10, and 20 loci at locations uniformly distributed along the length of the chromosome  
1132 arm. All selected loci were assumed to be fixed within each ancestral population. Selection  
1133 was additive and selective coefficients were assigned based on a uniform [0.005, 0.05]  
1134 distribution to either ancestry 0 or 1 alleles with equal probability. As above, these  
1135 simulations were conducted using SELAM [56].

1136

1137 For both selected and continuous migration simulations, we then performed the genotype  
1138 and read data simulation procedure, and reran our HMM as described above. We  
1139 performed 10 simulations for each treatment.

1140

### 1141 **Comparisons to WinPop**

1142 We next sought to compare our method to a commonly used local ancestry inference  
1143 method, WinPop [34]. Towards this, we again simulated data using MACS and SELAM as  
1144 described above. For these comparisons, the initial ancestry contribution was 0.5 and the  
1145 number of generations since admixture varied between 5 and 1000. For comparison, we  
1146 supplied WinPop and our program the correct time since admixture and ancestry  
1147 proportions, as these are required parameters for WinPop. We also supplied the program  
1148 with genotypes rather than read counts, another requirement of WinPop, whereas we  
1149 supplied our HMM with read data simulated as described above. We then ran WinPop  
1150 under default parameters, and we also reran WinPop using LD pruning within the  
1151 reference panels, as we do in our method, instead of the default LD pruning implemented in  
1152 WinPop.

1153

### 1154 **Analysis of Inuit Genotype Data**

1155 To demonstrate that LAI methods can be biased by the arbitrary selection of the time since  
1156 admixture, we analyzed a dataset of SNP-array genotype data from Greenlandic Inuits.  
1157 These data are described in detail elsewhere [60,61]. This population has received some  
1158 admixture from a European source population, and the authors had previously used RFMix  
1159 [24] to perform LAI, and found some sensitivity to the assumed time since admixture (J.

1160 Crawford *pers. Comm.*). We analyzed data from chromosome 10 using RFMix v1.5.4 [24] as  
1161 described in Moltke *et al.* [61] assuming admixture occurred either 5 or 20 generations ago.  
1162 We subsequently analyzed chromosome 10 using our HMM including the genotype-  
1163 analysis emissions probabilities and assuming a genotype error rate of 0.2%. For our  
1164 analysis we identified the LD cutoff that is appropriate for these data as described above.  
1165

### 1166 **Generating *D. melanogaster* Reference Populations**

1167 To generate reference panels, we used a subset of the high quality *D. melenaogaster*  
1168 assemblies that have been described previously in Pool *et al.* (2012) and Lack *et al.* (2015).  
1169 As in the local ancestry analysis of Pool (2015), we used the French population. For our  
1170 African reference panel, we selected a subset of the Eastern and Western African  
1171 populations (CO, RG, RC, NG, UG, GA, GU) and grouped them into a single population for the  
1172 purposes of our analysis. We elected to combine populations so that we would have a  
1173 larger reference panel of African populations for this analysis, this solution may be justified  
1174 because these *D. melanogaster* populations are only weakly genetically differentiated  
1175 [2,21,90], particularly after common inversion-bearing chromosomes are removed from  
1176 analyses. Specific individuals were selected for inclusion in the African reference panel if  
1177 previous work found they have relatively little cosmopolitan ancestry (*i.e.*, below 0.2  
1178 genome-wide in [2]).

1179  
1180 Because of their powerful effects on recombination, chromosomal inversions are known to  
1181 have substantial impacts on the distribution of genetic variants on chromosomes  
1182 containing chromosomal inversions in *D. melanogaster* [2,63]. For this reason, we removed

1183 all common inversion-bearing chromosome arms from the reference populations [91].  
1184 Nonetheless, it is clear that chromosomal inversions are present in the pool-seq samples  
1185 [64]. Although the inversions certainly violate key assumptions of our model—particularly  
1186 the transmission probabilities—given that our approach is robust to a many perturbations,  
1187 we expect the LA within inverted haplotypes can be estimated with reasonable confidence,  
1188 and the overall LAI procedure will still perform adequately with low frequencies of  
1189 chromosomal-inversion bearing chromosomes present within these samples.

1190  
1191 Although these reference populations are believed to have relatively little admixture, some  
1192 admixture is likely to remain within these samples [2]. To mitigate this potential issue, we  
1193 first applied our HMM to each reference population using the genotype-based emissions  
1194 probabilities (above). Calculated across all individuals, we found that our maximum  
1195 likelihood ancestry estimates were identical with those of Pool *et al.* (2012) at 96.2% of  
1196 markers considered in our analysis. The differences between the results of these methods  
1197 may reflect differences in the methodology of LAI or differences in the reference panels.  
1198 Nonetheless, the broad concordance suggests the two methods are yielding similar overall  
1199 results. We masked all sites where the posterior probability of non-native ancestry was  
1200 greater than 0.5 within each reference individual's genome. These masked sequences were  
1201 then used as the reference panel for the analyses of pool-seq data below.

1202

### 1203 **Ancestry Cline Sequence Data Analysis**

1204 We acquired pooled sequencing data from six populations from the east coast of the United  
1205 States. The generation of these samples, sequencing data, and accession numbers are

1206 described in detail in [21,40]. Briefly, the samples are comprised of individuals drawn from  
1207 natural populations and sequenced in relatively large pools of 66-232 chromosomes. We  
1208 aligned all data using BWA v0.7.9a-r786 [92] using the ‘MEM’ function and the default  
1209 program parameters. For all alignments, we used version 5 of the *D. melanogaster*  
1210 reference genome [93] in order to make our analysis and coordinates compatible with the  
1211 *Drosophila* genome nexus [91]. We then realigned all reads using the indelrealigner tool  
1212 within the GATK package [84], and we extracted the sequence pileup using samtools  
1213 mpileup v1.1 [94] using the program’s default parameters.

1214  
1215 We extracted sites at ancestry informative positions within the reference panels, where we  
1216 required that the reference panel have a minimum of 50% of individuals with a high quality  
1217 genotype call in both Cosmopolitan and African reference populations. As above, ancestry  
1218 informative sites were defined as those with a minimum of 20% difference in allele  
1219 frequencies between the reference panels used, and we retained only ancestry informative  
1220 sites for our analyses. We then produced global ancestry estimates for each chromosome  
1221 arm separately for each sample using the method of Bergland *et al.* (2016). We ran our  
1222 HMM for each chromosome arm and each population, and we provided the program this  
1223 estimate of the ancestry proportion and the time since admixture, 1593 generations [17].  
1224 We elected to provide the time since admixture because we have found that this parameter  
1225 is difficult to estimate in relatively large pools (see Results). However, the program can  
1226 accurately estimate LA in high ploidy samples even when the time since admixture cannot  
1227 be estimated correctly (see Results).

1228



## 1229 **Correlation with Local Recombination Rates**

1230 To assess the correlation between local recombination rates and LA in the genome, we  
1231 computed Spearman's rank sum correlation between the proportions African ancestry and  
1232 the local recombination rates in windows of 100 ancestry informative markers. As above,  
1233 we used the recombination rate estimates of [59]. We estimated confidence intervals using  
1234 1000 block-bootstrap samples using window sizes of 100 SNPs.

1235

## 1236 **Robustness of LAI to Genomic Heterogeneity**

1237 To determine if there are systematic biases in LAI across the genome, we computed the  
1238 mean difference in genomic windows between LA estimates for two samples from Maine  
1239 and between two samples from Florida. We assessed evidence for systematic biases  
1240 through the correlation between local recombination rates and differences in local ancestry  
1241 inference using Spearman's rank sum correlation.

1242

## 1243 **Identifying LA Cline Outliers**

1244 To detect loci that show evidence for steeper ancestry clines than the genomic average, we  
1245 first computed the Spearman's rank correlation between mean ancestry proportions and  
1246 latitude for each chromosome arm separately. Then, for each site for which we obtained a  
1247 posterior ancestry distribution for all samples, we computed the partial Spearman's rank  
1248 correlation between the posterior ancestry mean and latitude while correcting for the  
1249 correlation between latitude and the overall ancestry proportion. We then computed the  
1250 probability of obtaining the observed partial correlation in R, which implements the  
1251 approach of [95], and we retained those sites where the probability of the partial

1252 correlation between local ancestry and latitude was less than 0.005 as significant in our  
1253 analysis. Although this cutoff is arbitrary, given the strong evidence for local adaptation  
1254 and reproductive isolation in these populations [46,47,96], the tail of the LA cline  
1255 distribution will likely be enriched for sites experiencing selection on this ancestry  
1256 gradient. Due to linkage, adjacent sites show strong autocorrelation. We therefore selected  
1257 the local optima for a given clinically significant LA segment (*i.e.* a tract where all positions  
1258 are significantly correlated with latitude at our threshold) and retained these for analyses  
1259 of outlier loci. Finally, to further reduce the effect of autocorrelation, we retained only  
1260 those local optima for which no other optimum had a stronger correlation with latitude  
1261 within 100,000bp on either side on the site.

1262

### 1263 **Identifying Low African Ancestry Outlier Loci**

1264 To identify loci with a disproportionately low proportion of African ancestry across this  
1265 ancestry cline, we computed the mean African ancestry across all populations. We then  
1266 selected those sites in the lowest 5% tail on each chromosome arm and selected only the  
1267 local minima within 100kb windows on either side of a selected locus.

1268

### 1269 **Gene Ontology Analyses**

1270 We performed Gene-ontology (GO) analyses on outlier SNPs using Gowinda [97], where the  
1271 background set of SNPs was all positions at which we obtained a posterior distribution in  
1272 all samples (*i.e.* the set on which we obtained estimates of the posterior probability of  
1273 African ancestry). We ran the program using default parameters, except that we included  
1274 all genes within 10000bp of a focal SNP, and we performed 1e6 total GO simulations.

1275

## 1276 **Seasonality of LA in the Pennsylvania Populations**

1277 To identify recurrent seasonal changes in the local ancestry, we followed an approach  
1278 similar to [40]. Specifically, we fit a generalized linear model of the form

1279

$$1280 \quad \textit{Mean Posterior Ancestry} \sim \textit{Season} + \varepsilon$$

1281

1282 We then recorded the estimated effect size, and probability of the observed correlation for  
1283 each site in the genome at which we obtained a posterior ancestry distribution in all  
1284 samples considered. To correct for multiple testing, we applied a false discovery rate  
1285 correction [81] to the resulting p-value distribution.

1286

## 1287 **Acknowledgements**

1288 We thank three anonymous reviewers, Tyler Linderoth, Shelbi Russell and members of the  
1289 Nielsen and Slatkin labs for helpful comments. We also thank Jacob Crawford for providing  
1290 Inuit polymorphism data and for providing the observation that LAI inference depended  
1291 heavily on  $t$ .

1292

## 1293 **References**

- 1294 1. Kronforst MR, Young LG, Blume LM, Gilbert LE. Multilocus analyses of admixture and  
1295 introgression among hybridizing *Heliconius* butterflies. *Evolution*. 2006;60: 1254–16.  
1296 doi:10.1554/06-005.1
- 1297 2. Pool JE, Corbett-Detig RB, Sugino RP, Stevens KA, Cardeno CM, Crepeau MW, et al.  
1298 Population genomics of sub-Saharan *Drosophila melanogaster*: African diversity and  
1299 non-African admixture. *PLoS Genet*. 2012;8: e1003080–24.  
1300 doi:10.1371/journal.pgen.1003080

- 1301 3. Hufford MB, Lubinsky P, Pyhäjärvi T, Devengenzo MT, Ellstrand NC, Ross-Ibarra J.  
1302 The genomic signature of crop-wild introgression in maize. *PLoS Genet.* 2013;9:  
1303 e1003477–13. doi:10.1371/journal.pgen.1003477
- 1304 4. Brandvain Y, Kenney AM, Flagel L, Coop G, Sweigart AL. Speciation and introgression  
1305 between *Mimulus nasutus* and *Mimulus guttatus*. *PLoS Genet.* 2014;10: e1004410–  
1306 15. doi:10.1371/journal.pgen.1004410
- 1307 5. Rieseberg LH, Raymond O, Rosenthal DM, Lai Z, Livingstone K, Nakazato T, et al.  
1308 Major ecological transitions in wild sunflowers facilitated by hybridization. *Science.*  
1309 2003;301: 1211–1216. doi:10.1126/science.1086949
- 1310 6. Green RE, Krause J, Briggs AW, Maricic T, Stenzel U, Kircher M, et al. A draft sequence  
1311 of the neandertal genome. *Science.* 2010;328: 710–722.  
1312 doi:10.1126/science.1188021
- 1313 7. Sankararaman S, Mallick S, Dannemann M, Prüfer K, Kelso J, Pääbo S, et al. The  
1314 genomic landscape of Neanderthal ancestry in present-day humans. *Nature.*  
1315 2014;507: 354–357. doi:10.1038/nature12961
- 1316 8. Price AL, Patterson NJ, Plenge RM, Weinblatt ME, Shadick NA, Reich D. Principal  
1317 components analysis corrects for stratification in genome-wide association studies.  
1318 *Nat Genet.* 2006;38: 904–909. doi:10.1038/ng1847
- 1319 9. Lohmueller KE, Pearce CL, Pike M, Lander ES, Hirschhorn JN. Meta-analysis of genetic  
1320 association studies supports a contribution of common variants to susceptibility to  
1321 common disease. *Nat Genet.* 2003;33: 177–182. doi:10.1038/ng1071
- 1322 10. Freedman ML, Reich D, Penney KL, McDonald GJ, Mignault AA, Patterson N, et al.  
1323 Assessing the impact of population stratification on genetic association studies. *Nat*  
1324 *Genet.* 2004;36: 388–393. doi:10.1038/ng1333
- 1325 11. Caracristi G, Schlotterer C. Genetic differentiation between American and European  
1326 *Drosophila melanogaster* populations could be attributed to admixture of African  
1327 alleles. *Mol Biol Evol.* 2003;20: 792–799. doi:10.1093/molbev/msg091
- 1328 12. Kolbe JJ, Glor RE, Schettino LR, Lara AC, Larson A. Genetic variation increases during  
1329 biological invasion by a Cuban lizard. *Nature.* 2004;431: 177–181.
- 1330 13. Consortium THG, Consortium G. Butterfly genome reveals promiscuous exchange of  
1331 mimicry adaptations among species. *Nature.* 2012;487: 94–98.  
1332 doi:10.1038/nature11041
- 1333 14. Racimo F, Sankararaman S, Nielsen R, Huerta-Sanchez E. Evidence for archaic  
1334 adaptive introgression in humans. *Nat Genet.* 2015;16: 359–371.  
1335 doi:10.1038/nrg3936

- 1336 15. Juric I, Aeschbacher S, Coop G. The strength of selection against Neanderthal  
1337 introgression. *bioRxiv*. 2015 Oct pp. 1–24. doi:10.1101/030148
- 1338 16. Harris K, Nielsen R. The genetic cost of neanderthal introgression. *Genetics*.  
1339 2016;203: 881–891. doi:10.1534/genetics.116.186890
- 1340 17. Pool JE. The mosaic ancestry of the *Drosophila* Genetic Reference Panel and the *D.*  
1341 *melanogaster* reference genome reveals a network of epistatic fitness interactions.  
1342 *Mol Biol Evol*. 2015;: msv194–16. doi:10.1093/molbev/msv194
- 1343 18. Schumer M, Cui R, Powell DL, Dresner R, Rosenthal GG, Andolfatto P. High-resolution  
1344 mapping reveals hundreds of genetic incompatibilities in hybridizing fish species.  
1345 *eLife*. 2014;3: 610–21. doi:10.7554/eLife.02535
- 1346 19. Pritchard JK, Stephens M, Donnelly P. Inference of population structure using  
1347 multilocus genotype data. *Genetics*. 2000;155: 945–959.
- 1348 20. Skotte L, Korneliussen TS, Albrechtsen A. Estimating individual admixture  
1349 proportions from next generation sequencing data. *Genetics*. 2013;195: 693–702.  
1350 doi:10.1534/genetics.113.154138/-/DC1
- 1351 21. Bergland AO, Tobler R, González J, Schmidt P, Petrov D. Secondary contact and local  
1352 adaptation contribute to genome-wide patterns of clinal variation in *Drosophila*  
1353 *melanogaster*. *Mol Ecol*. 2016;25: 1157–1174. doi:10.1111/mec.13455
- 1354 22. Falush D, Stephens M, Pritchard JK. Inference of population structure using  
1355 multilocus genotype data: linked loci and correlated allele frequencies. *Genetics*.  
1356 2003;164: 1567–1587.
- 1357 23. Sankararaman S, Sridhar S, Kimmel G, Halperin E. Estimating local ancestry in  
1358 admixed populations. *Am J Hum Genet*. 2008;82: 290–303.  
1359 doi:10.1016/j.ajhg.2007.09.022
- 1360 24. Maples BK, Gravel S, Kenny EE, Bustamante CD. RFMix: a discriminative modeling  
1361 approach for rapid and robust local-ancestry inference. *Am J Hum Genet*. 2013;93:  
1362 278–288. doi:10.1016/j.ajhg.2013.06.020
- 1363 25. Baran Y, Pasaniuc B, Sankararaman S, Torgerson DG, Gignoux C, Eng C, et al. Fast and  
1364 accurate inference of local ancestry in Latino populations. *Bioinformatics*. 2012;28:  
1365 1359–1367. doi:10.1093/bioinformatics/bts144
- 1366 26. Pool JE, Nielsen R. Inference of historical changes in migration rate from the lengths  
1367 of migrant tracts. *Genetics*. 2009;181: 711–719. doi:10.1534/genetics.108.098095
- 1368 27. Koopman W, Li Y, Coart E. Linked vs. unlinked markers: multilocus microsatellite  
1369 haplotype-sharing as a tool to estimate gene flow and introgression. *Mol Ecol*.  
1370 2007;16: 243–256. doi:10.1111/j.1365-294X.2006.03137.x

- 1371 28. Patterson N, Hattangadi N, Lane B. Methods for high-density admixture mapping of  
1372 disease genes. *Am J Hum Genet.* 2004;74: 979–1000.
- 1373 29. Gravel S. Population Genetics Models of Local Ancestry. *Genetics.* 2012;191: 607–  
1374 619. doi:10.1534/genetics.112.139808
- 1375 30. Moorjani P, Patterson N, Hirschhorn JN, Keinan A, Hao L, Atzmon G, et al. The history  
1376 of African gene flow into southern Europeans, Levantines, and Jews. *PLoS Genet.*  
1377 2011;7: e1001373–13. doi:10.1371/journal.pgen.1001373
- 1378 31. Loh PR, Lipson M, Patterson N, Moorjani P. Inferring admixture histories of human  
1379 populations using linkage disequilibrium. *Genetics.* 2013;193: 1233–1254.  
1380 doi:10.1534/genetics.112.147330/-/DC1
- 1381 32. Hellenthal G, Busby GBJ, Band G, Wilson JF, Capelli C, Falush D, et al. A Genetic Atlas  
1382 of Human Admixture History. *Science.* 2014;343: 747–751.  
1383 doi:10.1126/science.1243518
- 1384 33. Consortium 1GP, BGI-Shenzhen, European Bioinformatics Institute, Illumina,  
1385 Hospital BAW, College B, et al. An integrated map of genetic variation from 1,092  
1386 human genomes. *Nature.* 2012. doi:10.1038/nature11632
- 1387 34. Pasaniuc B, Sankararaman S, Kimmel G, Halperin E. Inference of locus-specific  
1388 ancestry in closely related populations. *Bioinformatics.* 2009;25: i213–i221.  
1389 doi:10.1093/bioinformatics/btp197
- 1390 35. Haddrill PR, Thornton KR, Charlesworth B, Andolfatto P. Multilocus patterns of  
1391 nucleotide variability and the demographic and selection history of *Drosophila*  
1392 *melanogaster* populations. *Genome Res.* 2005;15: 790–799. doi:10.1101/gr.3541005
- 1393 36. Thornton K, Andolfatto P. Approximate Bayesian inference reveals evidence for a  
1394 recent, severe bottleneck in a Netherlands population of *Drosophila melanogaster*.  
1395 *Genetics.* 2006;172: 1607–1619. doi:10.1534/genetics.105.048223
- 1396 37. Li H, Stephan W. Inferring the demographic history and rate of adaptive substitution  
1397 in *Drosophila*. *PLoS Genet.* 2006;2: e166. doi:10.1371/journal.pgen
- 1398 38. Duchon P, Živković D, Hutter S, Stephan W. Demographic inference reveals African  
1399 and European admixture in the North American *Drosophila melanogaster*  
1400 population. *Genetics.* 2013;193: 291–301. doi:10.1534/genetics.112.145912/-/DC1
- 1401 39. Langley CH, Stevens K, Cardeno C, Lee YCG, Schrider DR, Pool JE, et al. Genomic  
1402 variation in natural populations of *Drosophila melanogaster*. *Genetics.* 2012;192:  
1403 533–598. doi:10.1534/genetics.112.142018
- 1404 40. Bergland AO, Behrman EL, O'Brien KR, Schmidt PS, Petrov DA. Genomic evidence of  
1405 rapid and stable adaptive oscillations over seasonal time scales in *Drosophila*. *PLoS*

- 1406 Genet. 2014;10: e1004775–19. doi:10.1371/journal.pgen.1004775
- 1407 41. Schridder DR, Hahn MW, Begun DJ. Parallel evolution of copy-number variation across  
1408 continents in *Drosophila melanogaster*. Mol Biol Evol. 2016;33: 1308–1316.  
1409 doi:10.1093/molbev/msw014
- 1410 42. Reinhardt JA, Kolaczkowski B, Jones CD, Begun DJ, Kern AD. Parallel geographic  
1411 variation in *Drosophila melanogaster*. Genetics. 2014;197: 361–373.  
1412 doi:10.1534/genetics.114.161463/-/DC1
- 1413 43. Fabian DK, Kapun M, Nolte V, Kofler R, Schmidt PS, Schlotterer C, et al. Genome-wide  
1414 patterns of latitudinal differentiation among populations of *Drosophila*  
1415 *melanogaster* from North America. Mol Ecol. 2012;21: 4748–4769.  
1416 doi:10.1111/j.1365-294X.2012.05731.x
- 1417 44. Oakeshott JG, Gibson JB, Anderson PR, Knibb WR. Alcohol dehydrogenase and  
1418 glycerol-3-phosphate dehydrogenase clines in *Drosophila melanogaster* on different  
1419 continents. Evolution. 1982;36: 86–96.
- 1420 45. Berry A, Kreitman M. Molecular analysis of an allozyme cline: alcohol dehydrogenase  
1421 in *Drosophila melanogaster* on the east coast of North America. Genetics. 1993;134:  
1422 869–893.
- 1423 46. Yukilevich R, True JR. African morphology, behavior, and pheromones underlie  
1424 incipient sexual isolation between US and Caribbean *Drosophila melanogaster*.  
1425 Evolution. 2008;62: 2807–2828. doi:10.1111/j.1558-5646.2008.00488.x
- 1426 47. Lachance J, True JR. X-autosome incompatibilities in *Drosophila melanogaster*: test of  
1427 Haldane's rule and geographic patterns within species. Evolution. 2010;64: 3035–  
1428 3046. doi:10.1111/j.1558-5646.2010.01028.x
- 1429 48. Corbett-Detig RB, Zhou J, Clark AG, Hartl DL, Ayroles JF. Genetic incompatibilities are  
1430 widespread within species. Nature. 2013;504: 135–137. doi:10.1038/nature12678
- 1431 49. Langley CH, Crepeau M, Cardeno C, Corbett-Detig R, Stevens K. Circumventing  
1432 heterozygosity: sequencing the amplified genome of a single haploid *Drosophila*  
1433 *melanogaster* embryo. Genetics. 2011;188: 239–246.  
1434 doi:10.1534/genetics.111.127530
- 1435 50. Kofler R, Betancourt AJ, Schlotterer C. Sequencing of Pooled DNA Samples (Pool-Seq)  
1436 Uncovers Complex Dynamics of Transposable Element Insertions in *Drosophila*  
1437 *melanogaster*. PLoS Genet. 2012;8: e1002487–16.  
1438 doi:10.1371/journal.pgen.1002487
- 1439 51. terWengel PO, Kapun M, Nolte V, Kofler R, Flatt T, Schlotterer C. Adaptation of  
1440 *Drosophila* to a novel laboratory environment reveals temporally heterogeneous  
1441 trajectories of selected alleles. Mol Ecol. 2012;21: 4931–4941. doi:10.1111/j.1365-

- 1442 294X.2012.05673.x
- 1443 52. Kolaczkowski B, Kern AD, Holloway AK, Begun DJ. Genomic differentiation between  
1444 temperate and tropical Australian populations of *Drosophila melanogaster*. *Genetics*.  
1445 2011;187: 245–260. doi:10.1534/genetics.110.123059
- 1446 53. Kapun M, Schalkwyk H, McAllister B, Flatt T, Schlotterer C. Inference of chromosomal  
1447 inversion dynamics from Pool-Seq data in natural and laboratory populations of  
1448 *Drosophila melanogaster*. *Mol Ecol*. 2014;23: 1813–1827. doi:10.1111/mec.12594
- 1449 54. Zhu Y, Bergland AO, González J, Petrov DA. Empirical validation of pooled whole  
1450 genome population re-sequencing in *Drosophila melanogaster*. *PLoS ONE*. 2012;7:  
1451 e41901. doi:10.1371/journal.pone.0041901
- 1452 55. Chen GK, Marjoram P, Wall JD. Fast and flexible simulation of DNA sequence data.  
1453 *Genome Res*. 2008;19: 136–142. doi:10.1101/gr.083634.108
- 1454 56. Corbett-Detig R, Jones M. SELAM: simulation of epistasis and local adaptation during  
1455 admixture with mate choice. *Bioinformatics*. 2016;btw365.
- 1456 57. Liang M, Nielsen R. The lengths of admixture tracts. *Genetics*. 2014;197: 953–967.  
1457 doi:10.1534/genetics.114.162362
- 1458 58. Sankararaman S, Patterson N, Li H, Pääbo S, Reich D. The Date of Interbreeding  
1459 between Neandertals and Modern Humans. *PLoS Genet*. 2012;8: e1002947–9.  
1460 doi:10.1371/journal.pgen.1002947
- 1461 59. Comeron JM, Ratnappan R, Bailin S. The many landscapes of recombination in  
1462 *Drosophila melanogaster*. *PLoS Genet*. 2012;8: e1002905.  
1463 doi:10.1371/journal.pgen.1002905
- 1464 60. Moltke I, Grarup N, Jørgensen ME, Bjerregaard P, Treebak JT, Fumagalli M, et al. A  
1465 common Greenlandic TBC1D4 variant confers muscle insulin resistance and type 2  
1466 diabetes. *Nature*. 2014;512: 190–193. doi:10.1038/nature13425
- 1467 61. Moltke I, Fumagalli M, Korneliussen TS. Uncovering the genetic history of the  
1468 present-day Greenlandic population. *Am J Hum Genet*. 2015;96: 54–69.  
1469 doi:10.1016/j.ajhg.2014.11.012
- 1470 62. Voight BF, Kang HM, Ding J, Palmer CD, Sidore C, Chines PS, et al. The metabochip, a  
1471 custom genotyping array for genetic studies of metabolic, cardiovascular, and  
1472 anthropometric traits. *PLoS Genet*. 2012;8: e1002793–12.  
1473 doi:10.1371/journal.pgen.1002793
- 1474 63. Corbett-Detig RB, Hartl DL. Population genomics of inversion polymorphisms in  
1475 *Drosophila melanogaster*. 2012;8: e1003056–15. doi:10.1371/journal.pgen.1003056



- 1476 64. Kapun M, Fabian DK, Goudet J, Flatt T. Genomic evidence for adaptive inversion  
1477 clines in *Drosophila melanogaster*. *Mol Biol Evol.* 2016;33: 1317–1336.  
1478 doi:10.1093/molbev/msw016
- 1479 65. Mackay TFC, Richards S, Stone EA, Barbadilla A, Ayroles JF, Zhu D, et al. The  
1480 *Drosophila melanogaster* Genetic Reference Panel. *Nature.* 2012;482: 173–178.  
1481 doi:10.1038/nature10811
- 1482 66. Huang W, Massouras A, Inoue Y, Peiffer J, Ramia M, Tarone AM, et al. Natural  
1483 variation in genome architecture among 205 *Drosophila melanogaster* Genetic  
1484 Reference Panel lines. *Genome Res.* 2014;24: 1193–1208.  
1485 doi:10.1101/gr.171546.113
- 1486 67. Corbett-Detig RB, Cardeno C, Langley CH. Sequence-based detection and breakpoint  
1487 assembly of polymorphic inversions. *Genetics.* 2012;192: 131–137.  
1488 doi:10.1534/genetics.112.141622
- 1489 68. Kulathinal RJ, Stevison LS, Noor MAF. The genomics of speciation in *Drosophila*:  
1490 diversity, divergence, and introgression estimated using low-coverage genome  
1491 sequencing. *PLoS Genet.* 2009;5: e1000550–7. doi:10.1371/journal.pgen.1000550
- 1492 69. Krimbas CB, Powell JR. *Drosophila Inversion Polymorphism*. CRC Press; 1992.
- 1493 70. Aulard S, David JR, Lemenieur F. Chromosomal inversion polymorphism in  
1494 Afrotropical populations of *Drosophila melanogaster*. *Genet Res.* 2002;79: 49–63.  
1495 doi:10.1017/S0016672301005407
- 1496 71. Pasaniuc B, Sankararaman S, Torgerson DG, Gignoux C, Zaitlen N, Eng C, et al.  
1497 Analysis of Latino populations from GALA and MEC studies reveals genomic loci with  
1498 biased local ancestry estimation. *Bioinformatics.* 2013;29: 1407–1415.
- 1499 72. Ting CT, Takahashi A, Wu CI. Incipient speciation by sexual isolation in *Drosophila*:  
1500 concurrent evolution at multiple loci. *PNAS.* 2001;98: 6709–6713.
- 1501 73. Hollocher H, Ting CT, Wu ML, Wu CI. Incipient speciation by sexual isolation in  
1502 *Drosophila melanogaster*: extensive genetic divergence without reinforcement.  
1503 *Genetics.* 1997;147: 1191–1201.
- 1504 74. Hollocher H, Ting CT, Pollack F, Wu CI. Incipient speciation by sexual isolation in  
1505 *Drosophila melanogaster*: variation in mating preference and correlation between  
1506 sexes. *Evolution.* 1997;51: 1175–1181.
- 1507 75. Coyne JA. Genetics and speciation. *Nature.* 1992;335: 511–515.
- 1508 76. Coyne JA, Orr HA. Patterns of speciation in *Drosophila*. *Evolution.* 1989;43: 362–381.
- 1509 77. Charlesworth B, Coyne JA, Barton NH. The relative rates of evolution of sex

- 1510 chromosomes and autosomes. *American Naturalist*. 1987;130: 113–146.
- 1511 78. Levine MT, Begun DJ. Evidence of Spatially Varying Selection Acting on Four  
1512 Chromatin-Remodeling Loci in *Drosophila melanogaster*. *Genetics*. 2008;179: 475–  
1513 485. doi:10.1534/genetics.107.085423
- 1514 79. Ellis LL, Carney GE. Socially-Responsive Gene Expression in Male *Drosophila*  
1515 *melanogaster* Is Influenced by the Sex of the Interacting Partner. *Genetics*. 2011;187:  
1516 157–169. doi:10.1534/genetics.110.122754
- 1517 80. Edwards AC, Zwarts L, Yamamoto A, Callaerts P, Mackay TF. Mutations in many genes  
1518 affect aggressive behavior in *Drosophila melanogaster*. *BMC Biol*. 2009;7: 29–13.  
1519 doi:10.1186/1741-7007-7-29
- 1520 81. Benjamini Y, Hochberg Y. Controlling the false discovery rate: a practical and  
1521 powerful approach to multiple testing. *Journal of the Royal Statistical Society*.  
1522 1995;57: 289–300.
- 1523 82. Nielsen R, Korneliussen T, Albrechtsen A, Li Y, Wang J. SNP calling, genotype calling,  
1524 and sample allele frequency estimation from new-generation sequencing data. *PLoS*  
1525 *ONE*. 2012;7: e37558–11. doi:10.1371/journal.pone.0037558
- 1526 83. Fumagalli M, Vieira FG, Linderoth T, Nielsen R. ngsTools: methods for population  
1527 genetics analyses from next-generation sequencing data. *Bioinformatics*. 2014;30:  
1528 1486–1487.
- 1529 84. DePristo MA, Banks E, Poplin R, Garimella KV, Maguire JR, Hartl C, et al. A framework  
1530 for variation discovery and genotyping using next-generation DNA sequencing data.  
1531 *Nat Genet*. 2011;43: 491–498. doi:10.1038/ng.806
- 1532 85. Baird SJE, Barton NH, Etheridge AM. The distribution of surviving blocks of an  
1533 ancestral genome. *Theoretical Population Biology*. 2003;64: 451–471.  
1534 doi:10.1016/S0040-5809(03)00098-4
- 1535 86. Henn BM, Botigué LR, Gravel S, Wang W, Brisbin A, Byrnes JK, et al. Genomic ancestry  
1536 of north Africans supports back-to-Africa migrations. *PLoS Genet*. 2012;8:  
1537 e1002397–11. doi:10.1371/journal.pgen.1002397
- 1538 87. Marjoram P, Wall JD. Fast “coalescent” simulation. *BMC Genet*. 2006;7: 16–9.  
1539 doi:10.1186/1471-2156-7-16
- 1540 88. Kiefer J. Sequential minimax search for a maximum. *Proceedings of the American*  
1541 *Mathematical Society*. 1953;4: 502–506.
- 1542 89. Gutenkunst RN, Hernandez RD, Williamson SH, Bustamante CD. Inferring the joint  
1543 demographic history of multiple populations from multidimensional SNP frequency  
1544 data. *PLoS Genet*. 2009;5: e1000695–11. doi:10.1371/journal.pgen.1000695

- 1545 90. Pool JE, Aquadro CF. History and Structure of Sub-Saharan Populations of *Drosophila*  
1546 *melanogaster*. *Genetics*. 2006;174: 915–929. doi:10.1534/genetics.106.058693
- 1547 91. Lack JB, Cardeno CM, Crepeau MW, Taylor W, Corbett-Detig RB, Stevens KA, et al. The  
1548 *Drosophila* Genome Nexus: a population genomic resource of 623 *Drosophila*  
1549 *melanogaster* genomes, including 197 from a single ancestral range population.  
1550 *Genetics*. 2015;199: 1229–1241. doi:10.1534/genetics.115.174664/-/DC1
- 1551 92. Li H. Aligning sequence reads, clone sequences and assembly contigs with BWA-  
1552 MEM. arXiv preprint arXiv:13033997. 2013.
- 1553 93. Adams MD, Celniker SE, Holt RA, Evans CA, Gocayne JD, Amanatides PG. The genome  
1554 sequence of *Drosophila melanogaster*. *Science*. 2000;287: 2185–2195.
- 1555 94. Li H, Handsaker B, Wysoker A, Fennell T, Ruan J, Homer N, et al. The Sequence  
1556 Alignment/Map format and SAMtools. *Bioinformatics*. 2009;25: 2078–2079.  
1557 doi:10.1093/bioinformatics/btp352
- 1558 95. Best DJ, Roberts DE. Algorithm AS 89: the upper tail probabilities of Spearman's rho.  
1559 *Journal of the Royal Statistical Society Series C*. 1975;24: 377–379.
- 1560 96. Kao JY, Lymer S, Hwang SH, Sung A, Nuzhdin SV. Postmating reproductive barriers  
1561 contribute to the incipient sexual isolation of the United States and Caribbean  
1562 *Drosophila melanogaster*. *Ecol Evol*. 2015;5: 3171–3182. doi:10.1002/ece3.1596
- 1563 97. Kofler R, Schlötterer C. Gowinda: unbiased analysis of gene set enrichment for  
1564 genome-wide association studies. *Bioinformatics*. 2012;28: 2084–2085.  
1565 doi:10.1093/bioinformatics/bts315

1566

## 1567 **Figure Legends**

1568 **Figure 1.** The effect of increasing stringency with ancestral LD pruning. From left to right,  
1569 ancestry proportions are 0.1, 0.25, 0.5, 0.75 and 0.9.  $|r|$  cutoffs are: none (red), 1.0 (orange),  
1570 0.9 (yellow), 0.8 (green), 0.7 (dark blue), 0.6 (cyan), 0.5 (indigo), and 0.4 (violet). The solid  
1571 line indicates the expectation for unbiased time estimation. All read data were simulated  
1572 with ploidy = 1. True admixture time was drawn from a uniform (0, 2000) distribution.

1573

1574 **Figure 2.** Time estimates and accuracy statistics for samples of varying ploidies. From left  
1575 to right, ancestry proportions are 0.1, 0.25, 0.5, 0.75 and 0.9. Each sample ploidy is  
1576 represented by one point color with ploidy one (black), two (red), ten (blue) and twenty  
1577 (green). From top to bottom, each row is the estimated time in generations, the proportion  
1578 of sites where the true state is within the 95% credible interval, the width of the 95%  
1579 credible interval, the mean posterior error, and the proportion of sites where the maximum  
1580 likelihood estimate is equal to the true state.

1581

1582 **Figure 3.** Accuracy of the HMM for samples of high ploidy. The 95% credible interval  
1583 (shaded blue region), and the posterior mean (red) contrasted with the true ancestry  
1584 frequencies (black). Simulated data were generated with an admixture time of 1500  
1585 generations, an ancestry proportion of 0.2, a sample ploidy of 100, and a mean sequencing  
1586 depth of 25.

1587

1588 **Figure 4.** Admixture time estimates for simulated data consistent with variation present in  
1589 modern European and African populations. From left to right,  $m = 0.1$ ,  $m = 0.25$ ,  $m = 0.5$ ,  $m$   
1590  $= 0.75$ ,  $m = 0.9$ . The top row is completely phased chromosomes and the bottom row is  
1591 unphased diploid data.

1592

1593 **Figure 5.** Local ancestry of inversion bearing chromosomes (red) compared with those of  
1594 standard arrangement chromosomes (black) for the same chromosome arm. Positions of  
1595 inversion breakpoints, as reported in [63,67] are shown as vertical dashed lines.

1596

1597 **Figure 6.** The relationship between the proportion of African ancestry proportion and local  
1598 recombination rates in 100 ancestry informative SNP windows within the Raleigh, NC  
1599 population (left). The correlation between the proportion of African ancestry proportion  
1600 and local recombination rates in 100 ancestry informative SNP windows in all populations  
1601 assayed (right). Lines indicate the 95% confidence interval obtained via block bootstrap  
1602 replicates (see Methods).

1603  
1604 **Figure 7.** The partial correlation between LA and latitude with correction for chromosome-  
1605 wide ancestry proportions. Sites for which the probability of the observed clinal  
1606 relationship was less than 0.005 were retained as significant (red). Inversion breakpoints  
1607 for inversions that are at polymorphic frequencies on this ancestry cline are shown as  
1608 dotted blue lines.

1609  
1610 **Figure 8.** The mean African ancestry proportion across all populations on the ancestry  
1611 cline for chromosome arms 2L, 2R, 3L, 3R, and X (top to bottom). Local minima outlier loci  
1612 are shown in red (see Methods).

1613  
1614 **Supplemental Figure S1.** Comparison between LAI using the full ancestral recombination  
1615 graph via forward-time simulations (red) with those from independent and identically  
1616 distributed draws from the SMC' distribution (black). Simulations were conducted using an  
1617 ancestry proportion of 0.25 and population size of 10,000 hermaphroditic individuals.

1618

1619 **Supplemental Figure S2.** Effects of unknown admixed population sizes on LAI. All LAI was  
1620 conducted assuming the true population size was 10,000. Simulated population sizes were  
1621 100 (black), 1,000 (red), 10,000 (blue) and 100,000 (green). Ploidy 1 on the right, ploidy 2  
1622 on the left. From top to bottom, rows are the estimated time of admixture, the proportion of  
1623 sites where the true state is within the 95% credible interval, the width of the 95% credible  
1624 interval, the mean posterior error, and the proportion of times that the maximum  
1625 likelihood estimate is equal to the true state. For all simulations, the ancestry proportion  
1626 was equal to 0.5.

1627

1628 **Supplemental Figure S3.** LAI accuracy when admixture times are increasingly ancient.  
1629 Here, ancestry proportions are 0.5 (black), 0.25 (blue), 0.1 (violet), 0.75 (orange) and 0.9  
1630 (red). From top to bottom, statistics plotted are estimated time, the proportion of sites  
1631 where the true ancestry frequency is within the 95% credible interval, the mean 95%  
1632 credible interval width, mean posterior error, and the proportion of times that the  
1633 maximum likelihood estimate is correct.

1634

1635 **Supplemental Figure S4.** The effects of reference panel size on LAI and time estimation  
1636 using the HMM. Here, we compare reference panels of size 100 (blue) with reference  
1637 panels of size 10 (black). From left to right, ancestry proportions are 0.1, 0.25, 0.5, 0.75 and  
1638 0.9. From top to bottom the plotted statistics are estimated time, proportion in the 95%  
1639 credible interval, the average width of the 95% credible interval, the mean posterior error,  
1640 and the proportion of sites where the maximum likelihood ancestry estimate is correct.

1641

1642 **Supplemental Figure S5.** Accuracy of time estimation and LAI when reference populations  
1643 are increasingly divergent from the source of the admixture pulses. In columns are  
1644 divergence times between ancestral populations (in units of  $4N_e$ ) of 0, 0.0005, 0.001, 0.002.  
1645 From top to bottom the plotted statistics are estimated time, proportion in the 95%  
1646 credible interval, the average width of the 95% credible interval, the mean posterior error,  
1647 and the proportion of sites where the maximum likelihood ancestry estimate is correct.

1648  
1649 **Supplemental Figure S6.** Comparison of the proportion of sites where the maximum  
1650 likelihood ancestry estimate of local ancestry is correct between WinPop and our method.  
1651 WinPop was run with default parameters (black), and with LD pruned in the ancestral  
1652 populations, but not in the admixed population (red). Our method was run with default  
1653 parameters (blue), but with the time since admixture and correct ancestry proportion  
1654 supplied to our program as these parameters are required by WinPop.

1655  
1656 **Supplemental Figure S7.** Bias in LAI due to uncertainty in  $t$ . The posterior probability  
1657 estimated using RFMix of European ancestry at a given site in the genome assuming  $t = 5$   
1658 (black) and assuming  $t = 20$  (red) for a sample representative of the average difference (top  
1659 left) and a more extreme example (top right). The distribution of differences in mean Inuit  
1660 ancestry for all samples (bottom left) using RFMix. The log likelihood of each time since  
1661 admixture as computed using our method (bottom right), which shows a clear optimum at  
1662 6-7 generations since admixture. All analyses were restricted to SNPs on chromosome 10.

1663

1664 **Supplemental Figure S8.** Bias in LAI and time estimation due to incorrect estimation of  $m$ .  
1665 On the left, true  $m$  is 0.1 and on the right true  $m$  is 0.5. Supplied  $m$  varies across 0.05 to 0.95.  
1666 From top to bottom, the plotted statistics are estimated  $t$ , proportion in the 95% confidence  
1667 interval, mean 95% confidence interval width, mean posterior error and the proportion of  
1668 sites where the maximum likelihood estimate is correct. All plots include ploidy one  
1669 (back), ploidy two (red), ploidy ten (blue), and ploidy twenty (green).

1670  
1671 **Supplemental Figure S9.** Bias in LAI and time estimation due to incorrect assumptions of  
1672  $t$ . On the left, true  $t$  is 100 and on the right true  $t$  is 1000. Supplied  $t$  varies across 100 to  
1673 2000 generations. From top to bottom, the plotted statistics are estimated  $t$ , proportion in  
1674 the 95% confidence interval, mean 95% confidence interval width, mean posterior error  
1675 and the proportion of sites where the maximum likelihood estimate is correct. All plots  
1676 include ploidy one (back), ploidy two (red), ploidy ten (blue), and ploidy twenty (green).

1677  
1678 **Supplemental Figure S10.** Estimates of  $t$  obtained from block bootstrap replicates for  
1679 populations that have admixed for 1000 (top), and 2000 (bottom) generations. From left to  
1680 right, sample ploidies are 1, 2, 10, and 20. For both simulations,  $m = 0.5$ .

1681  
1682 **Supplemental Table S1.** Comparison of run times for various demographic models and  
1683 sample ploidies using this method.

1684  
1685 **Supplemental Table S2.** LA clinality in the genomic intervals immediately surrounding  
1686 breakpoints of known polymorphic inversions.



1687

1688 **Supplemental Table S3.** Results of GO analysis of 80 identified LA clinal outlier loci.

1689

1690 **Supplemental Table S4.** Results of GO analysis of 84 identified low African ancestry

1691 outlier loci.

$m = 0.1$  $m = 0.25$  $m = 0.5$  $m = 0.75$  $m = 0.9$ 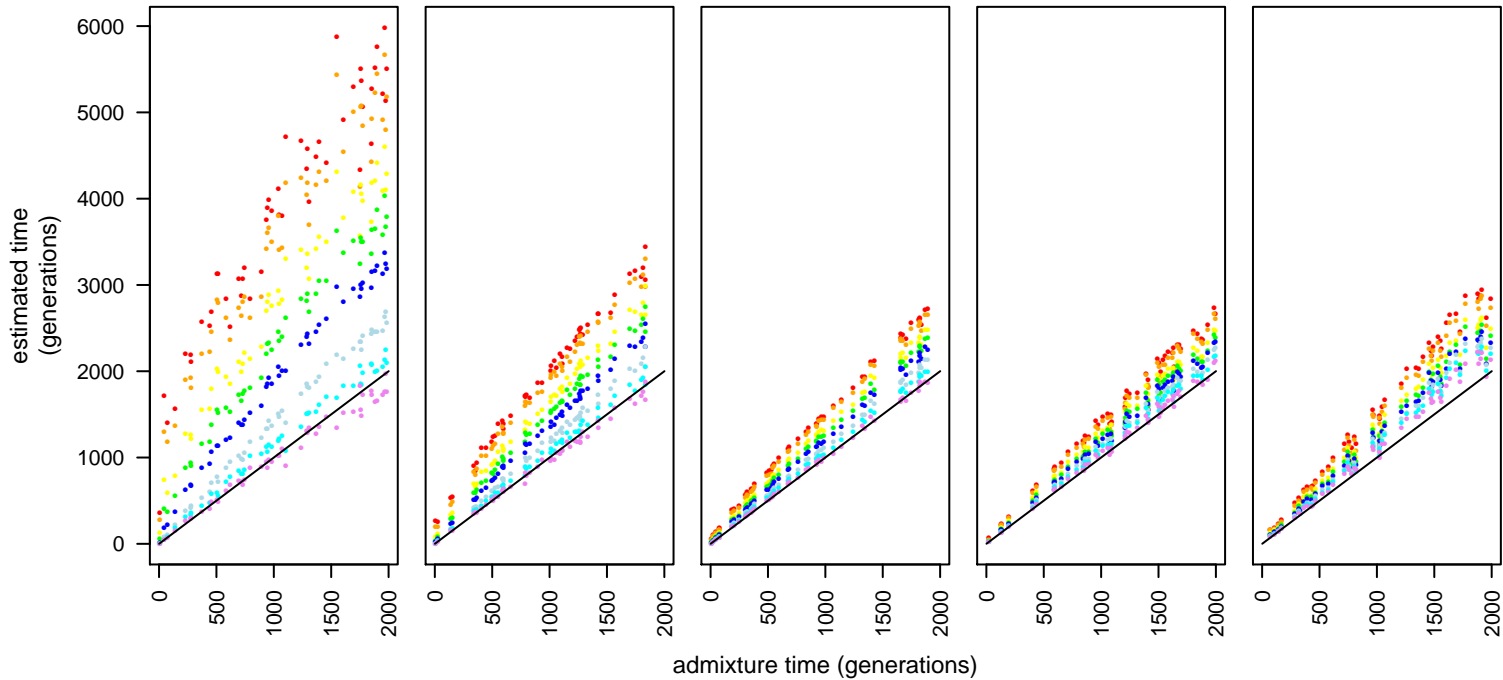

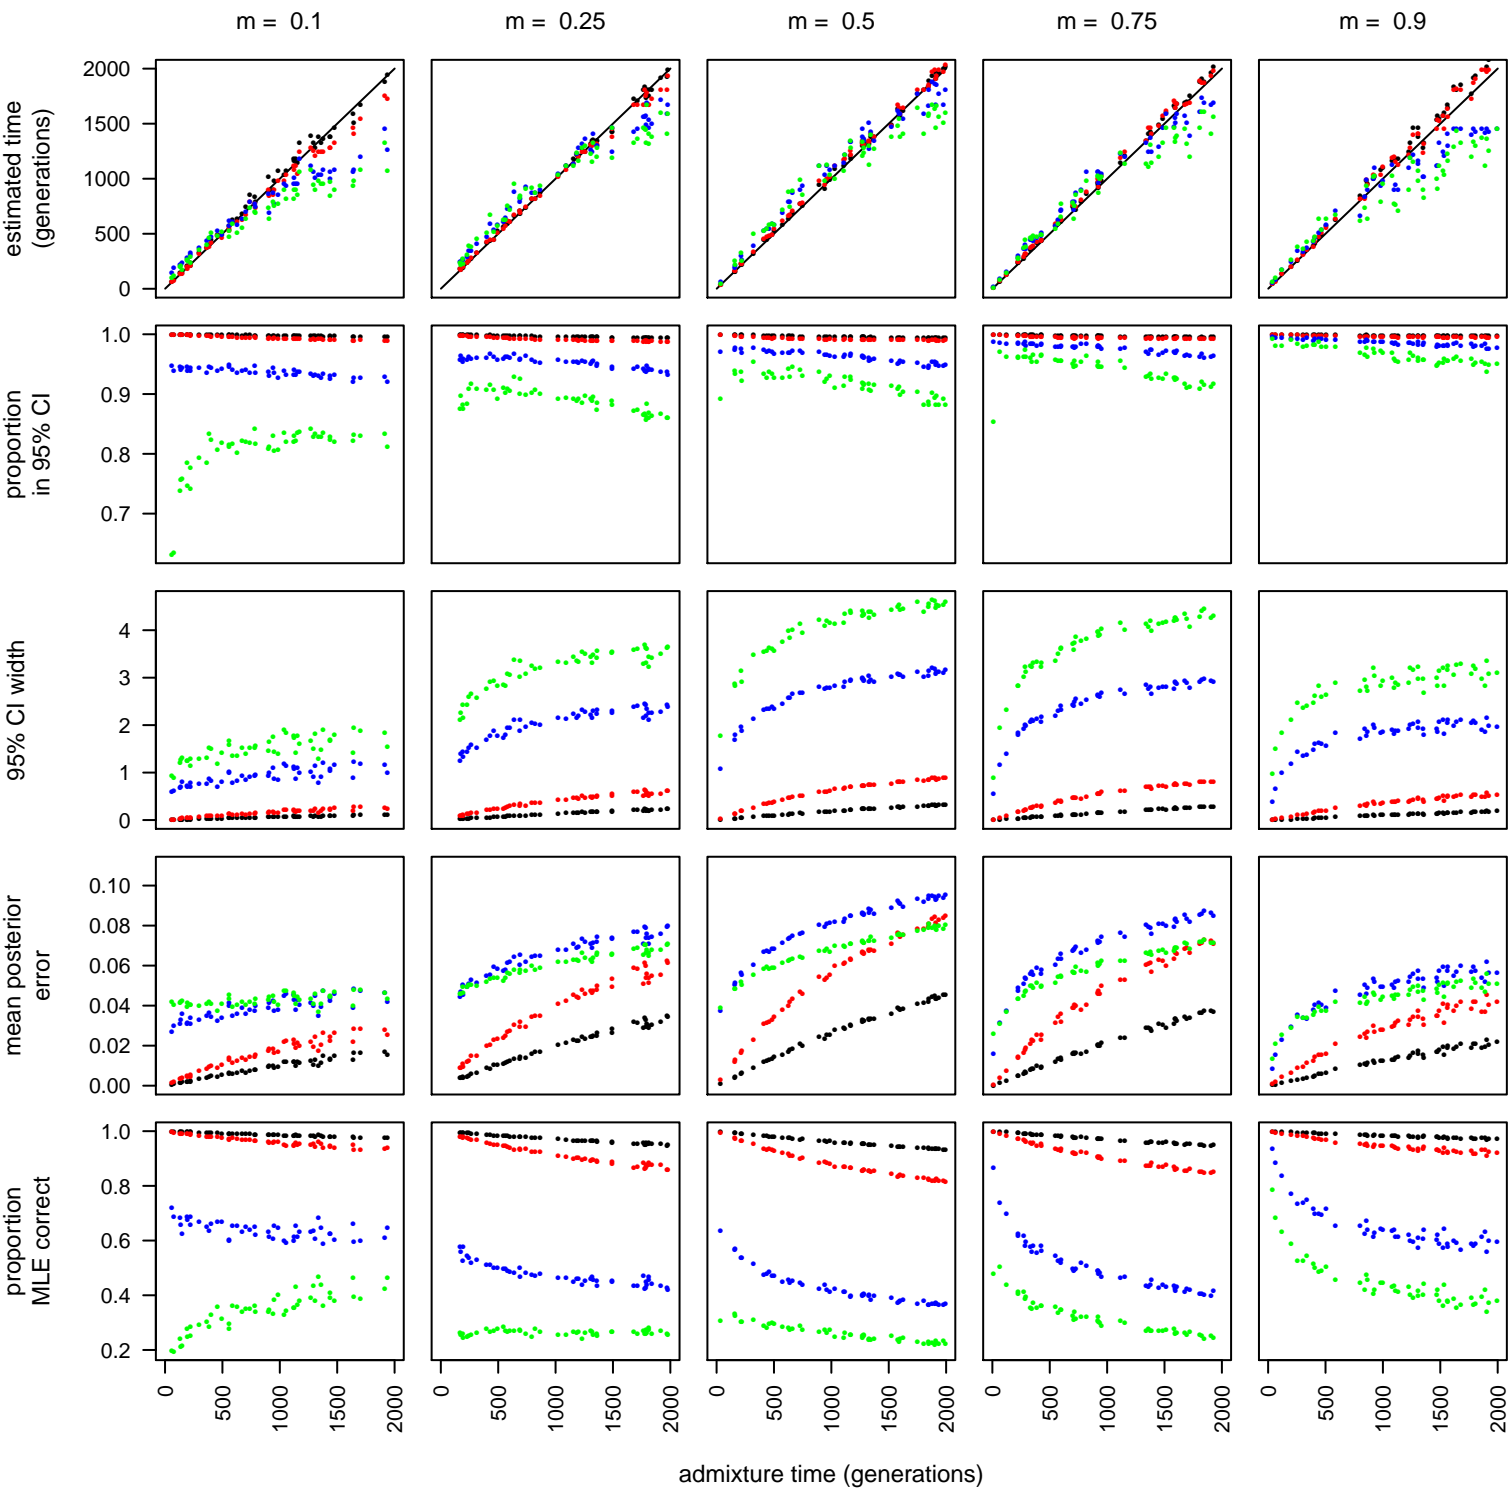

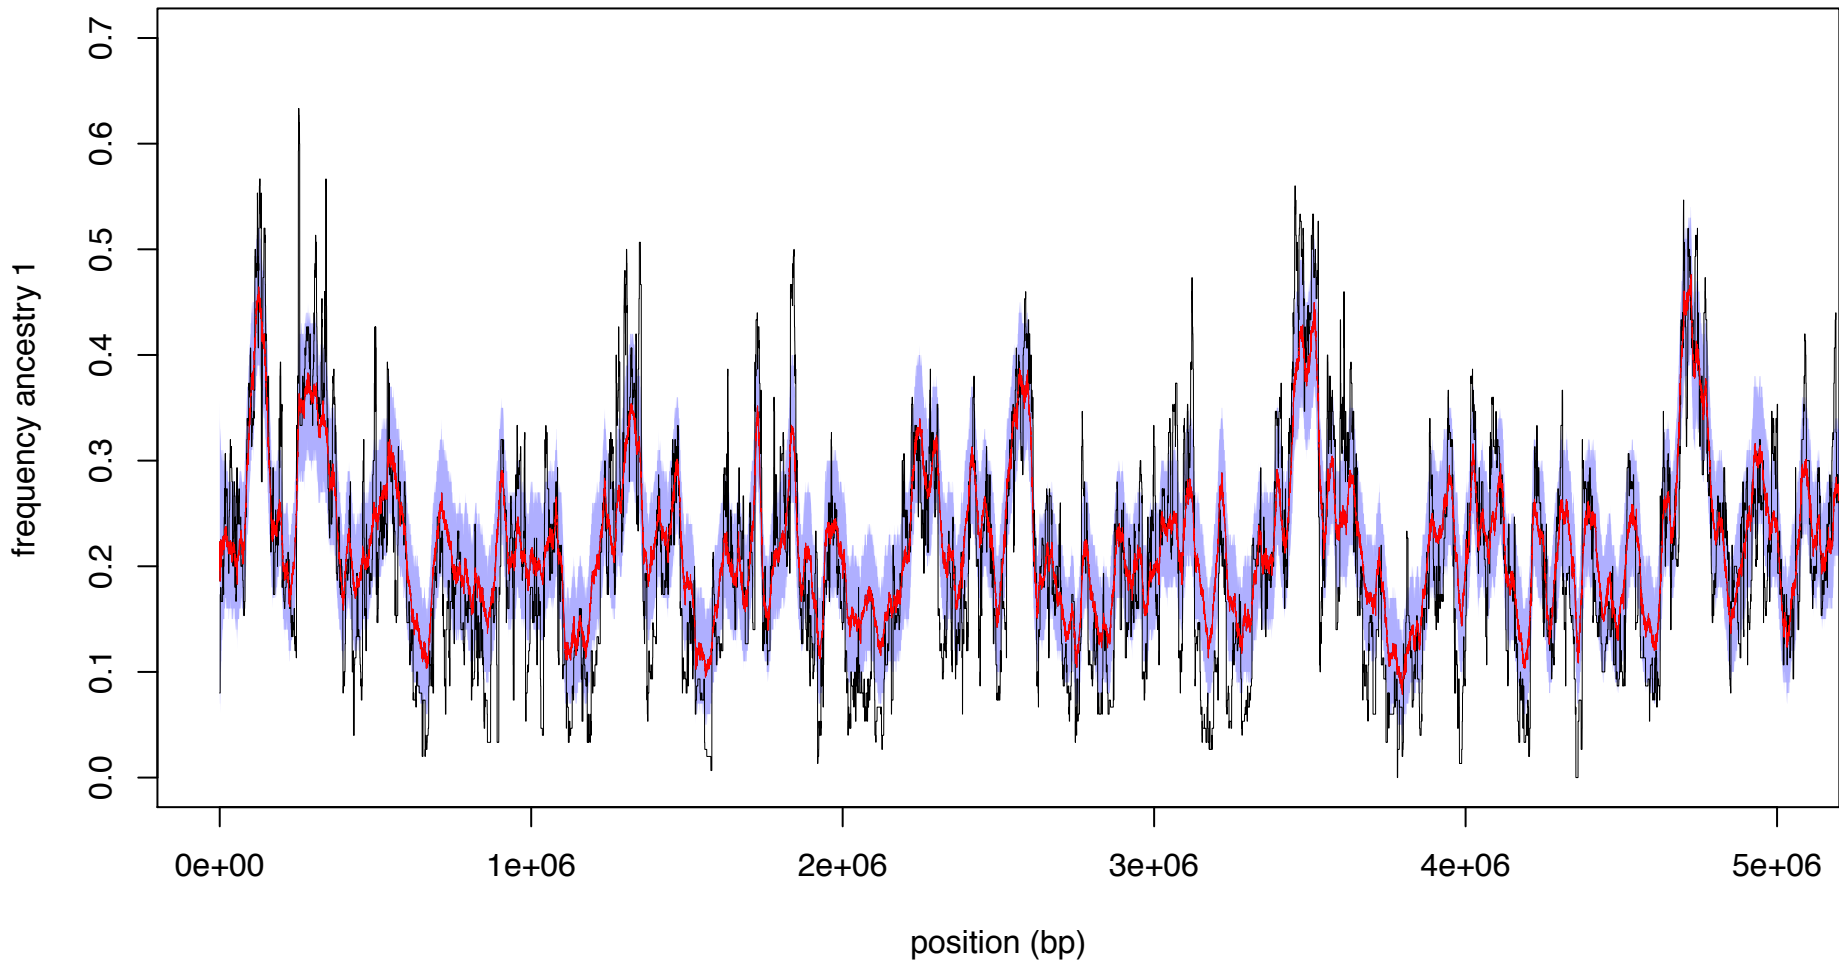

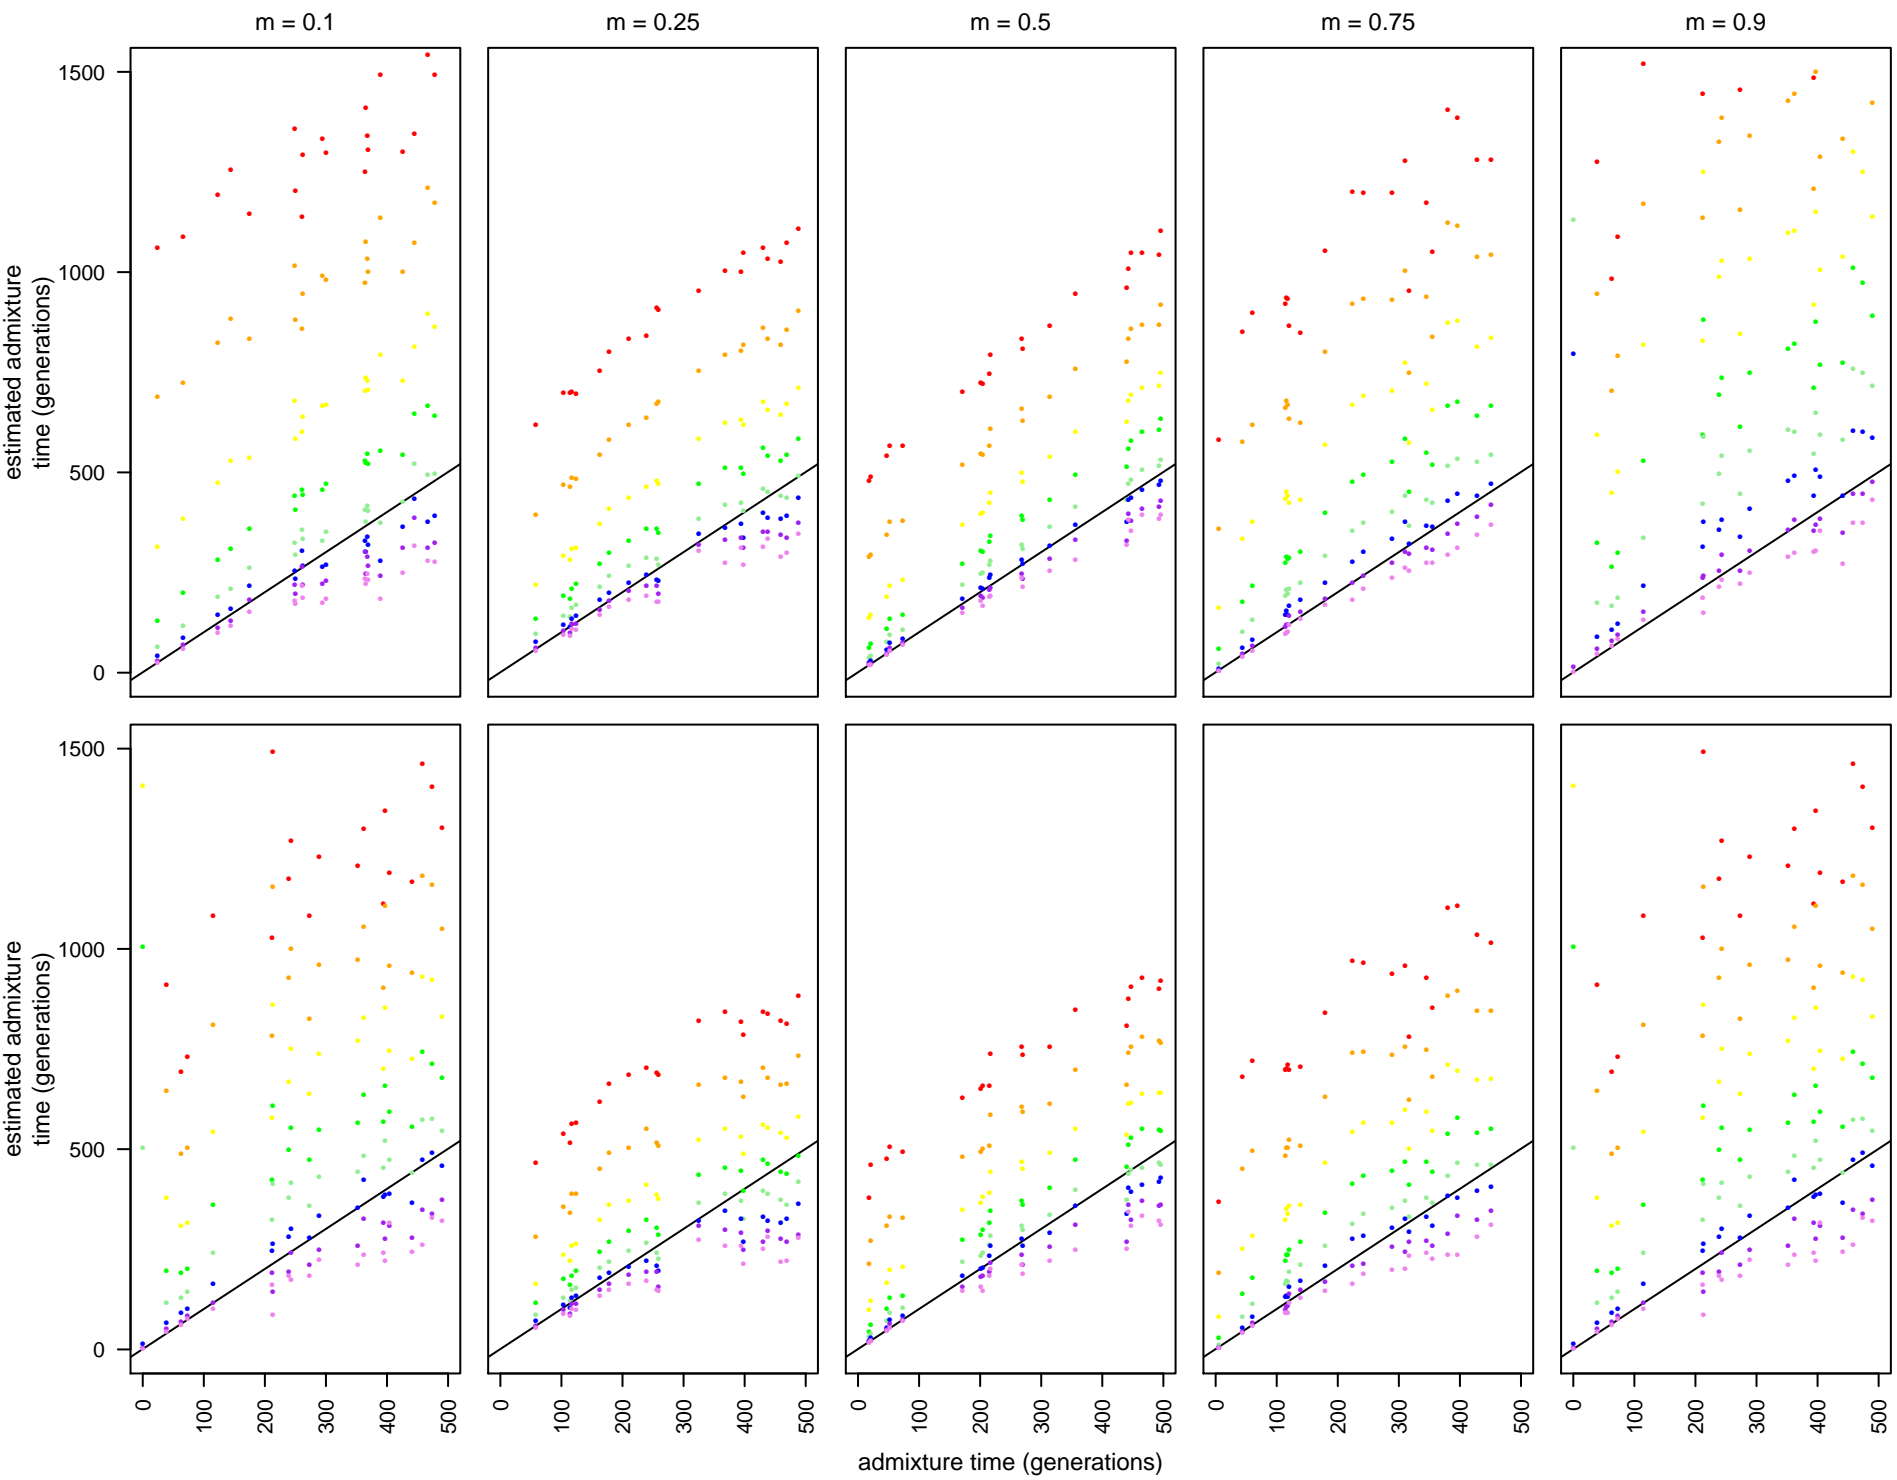

IN(2L)t

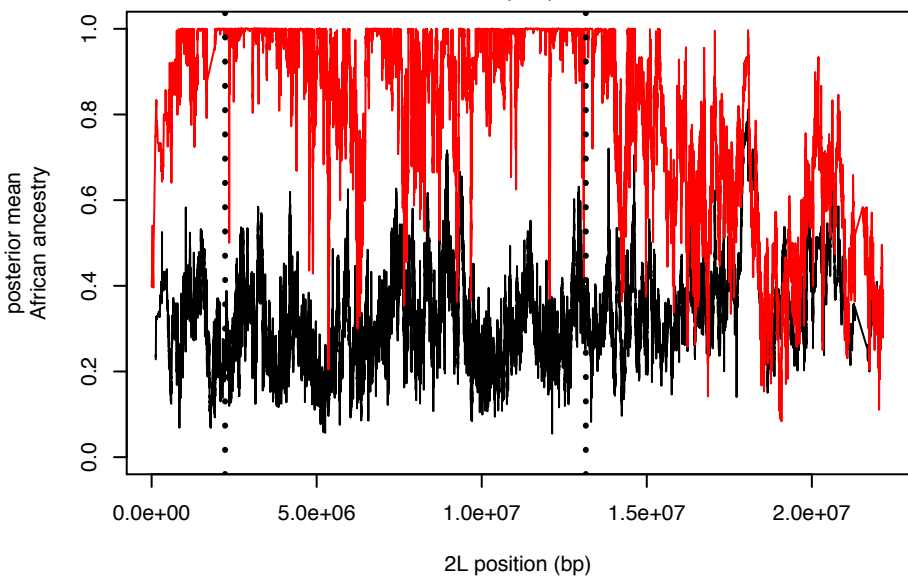

IN(2R)NS

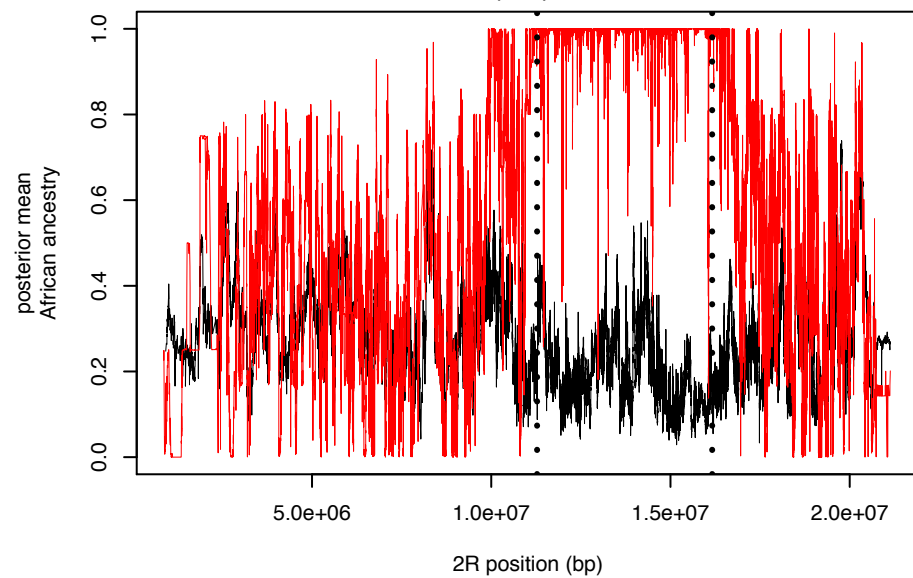

IN(3L)P

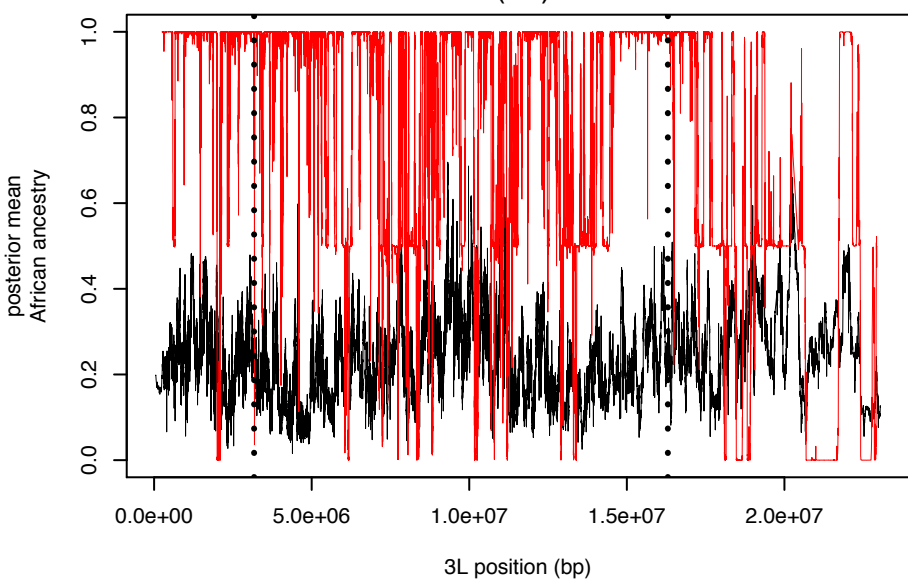

IN(3R)P

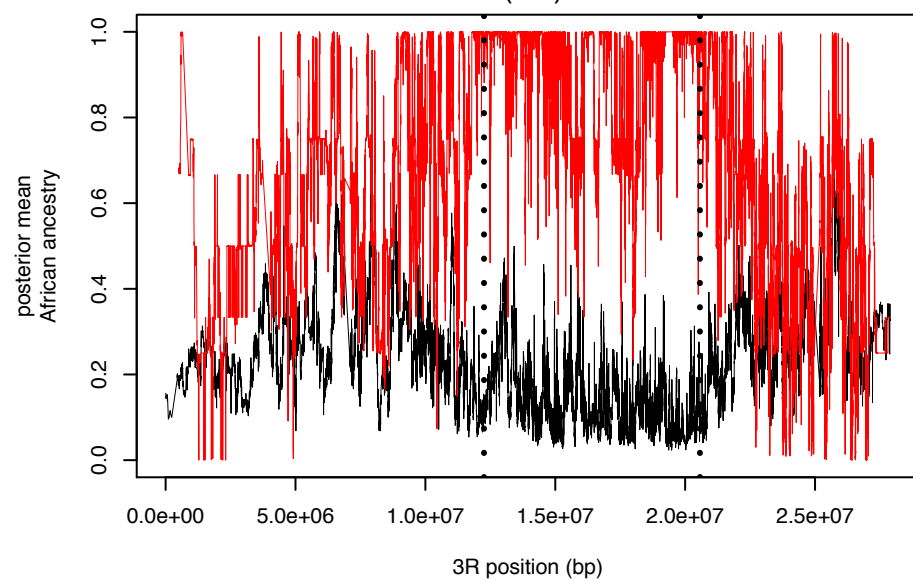

IN(3R)K

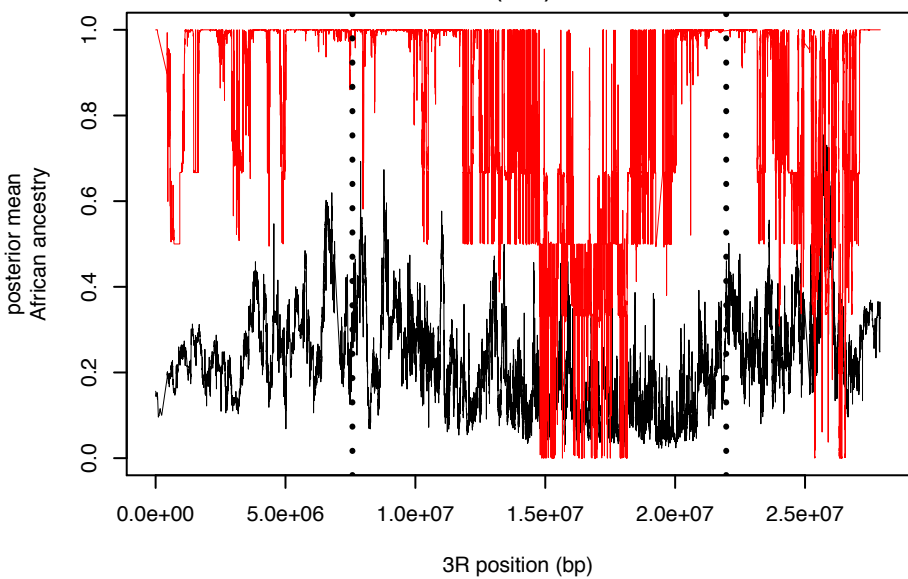

IN(3R)Mo

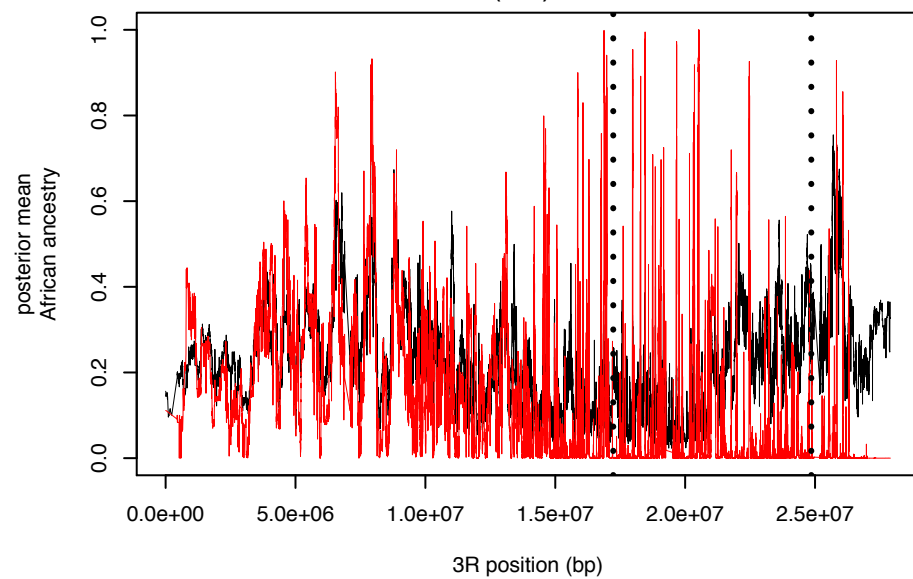

proportion african ancestry

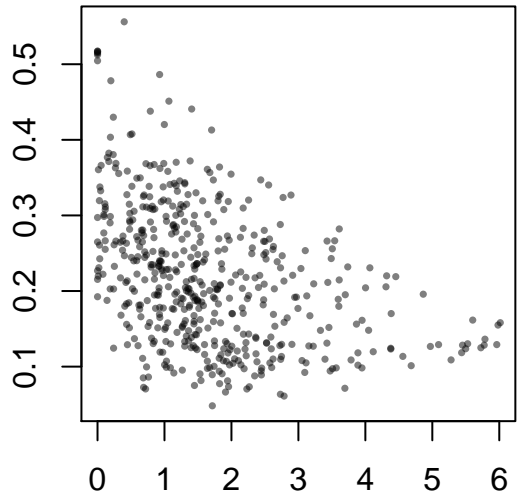

recombination rate (cm/mB)

spearman's rho

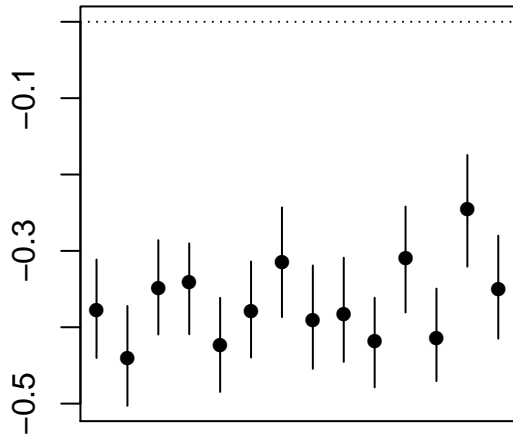

chromosome arm 2L

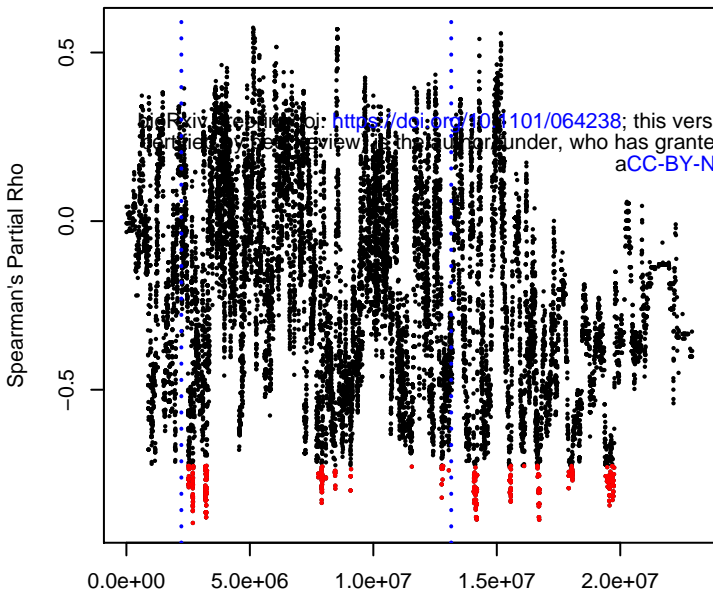

chromosome arm 2R

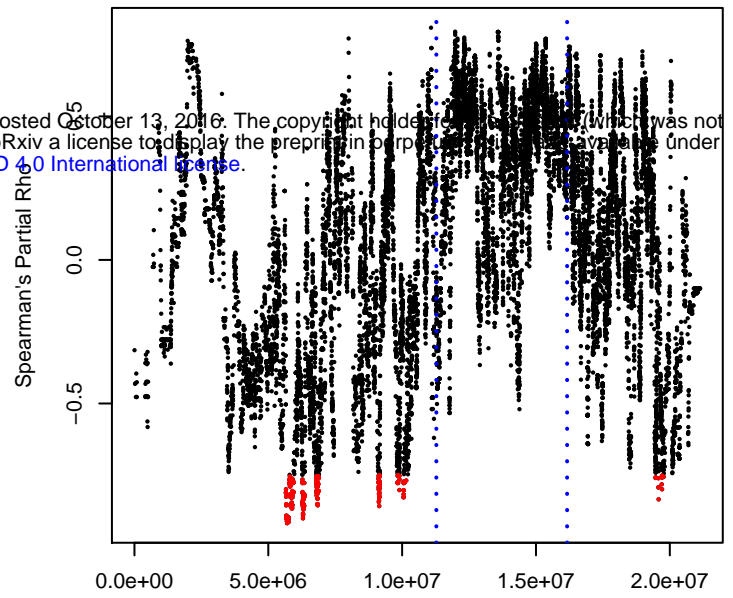

chromosome arm 3L

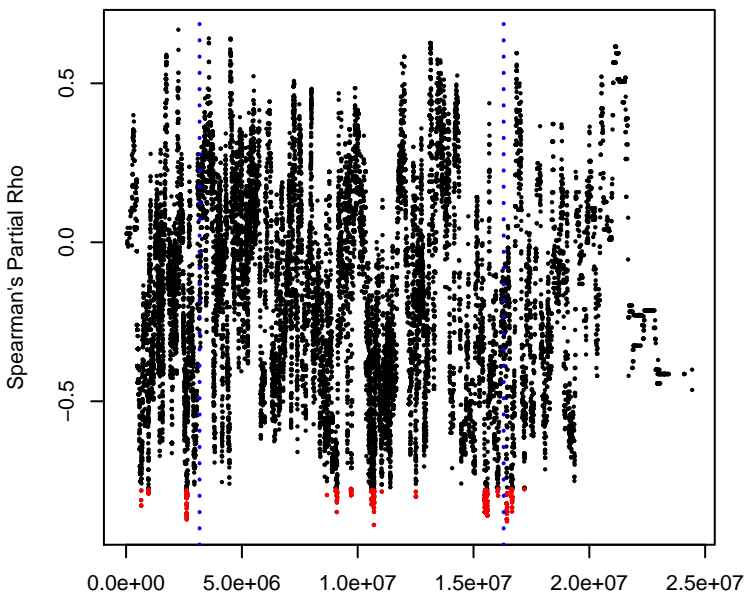

chromosome arm 3R

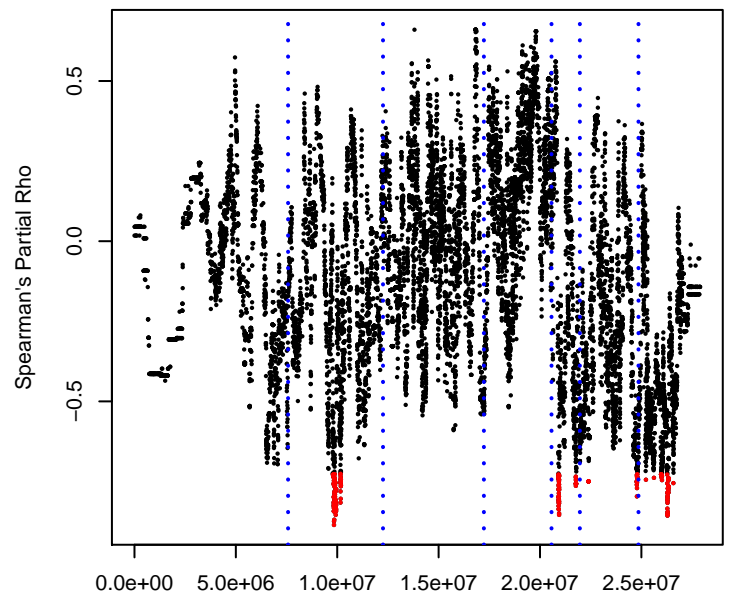

chromosome arm X

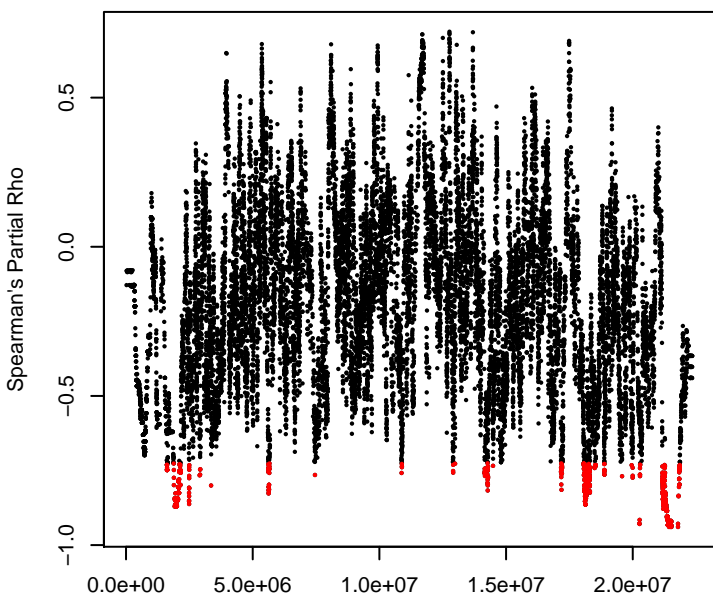



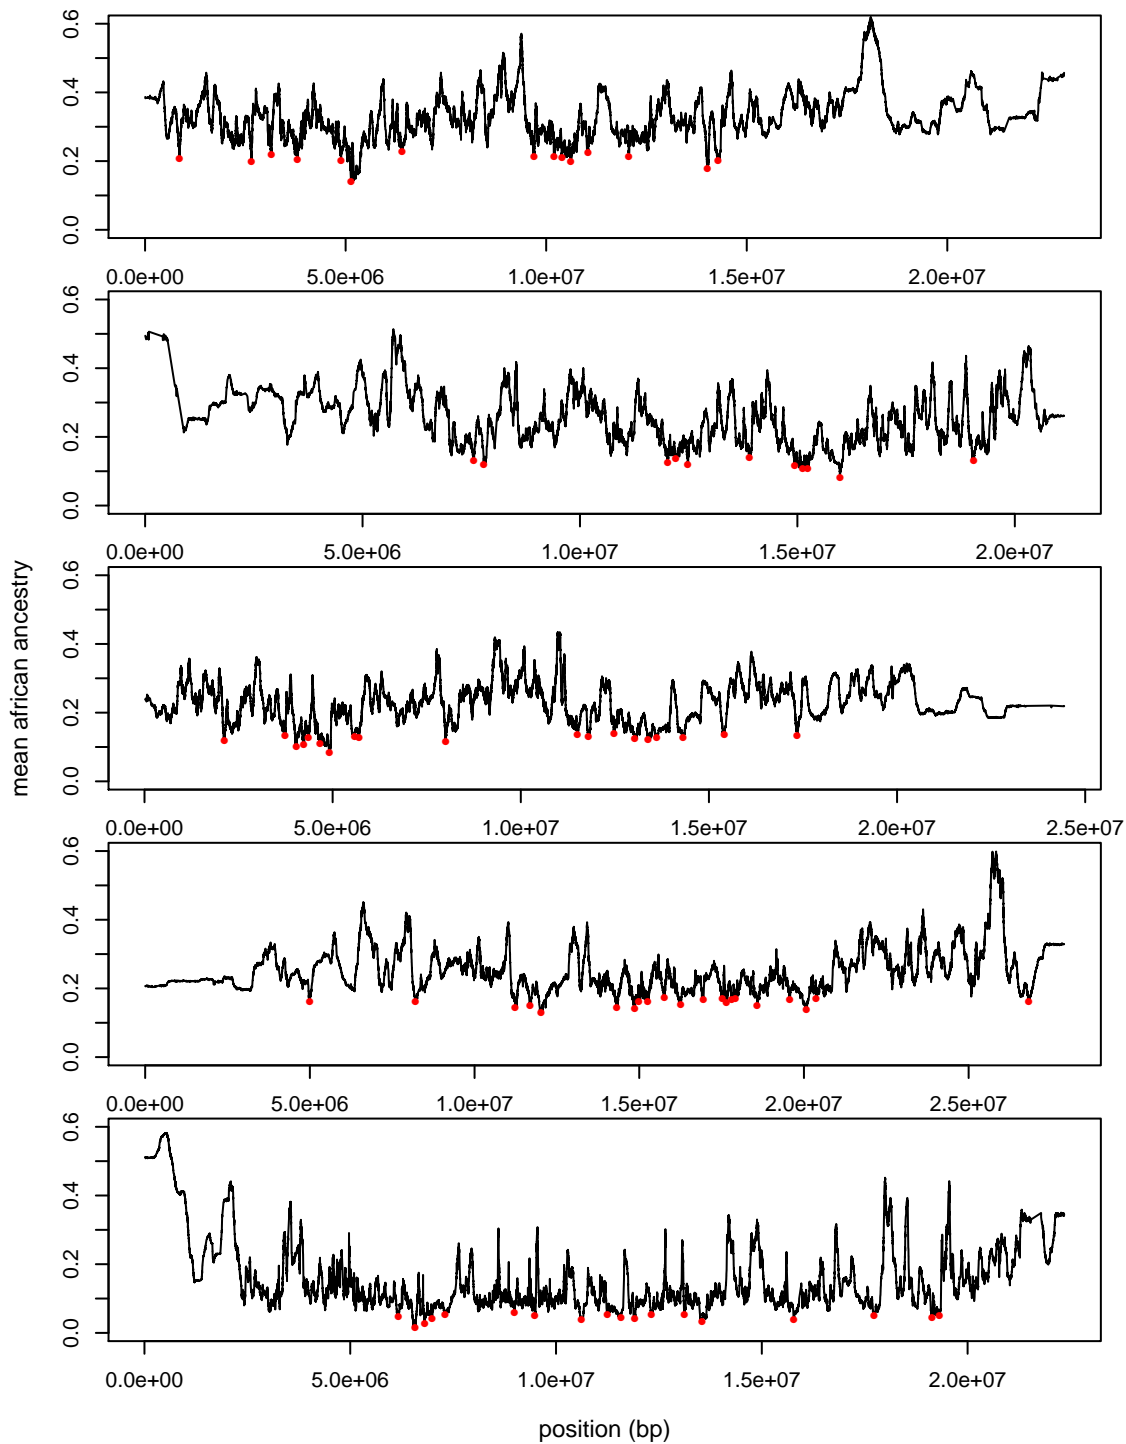

Source: http://www.biorxiv.org/content/10.1101/064238v2.full.pdf
